1 **The bacterial quorum sensing signal DSF hijacks *Arabidopsis thaliana* sterol biosynthesis to**  
2 **suppress plant innate immunity**

3

4 Tuan Minh Tran <sup>a,1</sup>, Zhiming Ma <sup>a,1</sup>, Alexander Triebel <sup>b,2,3</sup>, Sangeeta Nath <sup>c,d,2</sup>, Yingying Cheng <sup>e</sup>, Ben-  
5 Qiang Gong <sup>f</sup>, Xiao Han <sup>a</sup>, Junqi Wang <sup>g</sup>, Jian-Feng Li <sup>f</sup>, Markus R. Wenk <sup>b</sup>, Federico Torta <sup>b</sup>, Satyajit  
6 Mayor <sup>c,h</sup>, Liang Yang <sup>e,i</sup>, Yansong Miao <sup>a,j,4,\*</sup>

7

8 <sup>a</sup> School of Biological Sciences, Nanyang Technological University, Singapore 637551, Singapore

9 <sup>b</sup> Singapore Lipidomics Incubator (SLING), Department of Biochemistry, YLL School of Medicine, National  
10 University of Singapore, Singapore, Singapore

11 <sup>c</sup> Institute for Stem Cell Biology and Regenerative Medicine, Bellary Road, Bangalore, 560065, India.

12 <sup>d</sup> Manipal Institute of Regenerative Medicine, Manipal Academy of Higher Education, Bangalore, 560065,  
13 India

14 <sup>e</sup> Singapore Centre for Environmental Life Sciences Engineering, Nanyang Technological University,  
15 Singapore 637551

16 <sup>f</sup> School of Life Sciences, Sun Yat-sen University, Guangzhou 510275, China

17 <sup>g</sup> Department of Biology, Southern University of Science and Technology, Shenzhen, China, 518055

18 <sup>h</sup> National Centre for Biological Sciences, Tata Institute for Fundamental Research, Bellary Road,  
19 Bangalore 560065, India.

20 <sup>i</sup> School of Medicine, Southern University of Science and Technology, Nanshan District, Shenzhen, China,  
21 518055

22 <sup>j</sup> School of Chemical and Biomedical Engineering, Nanyang Technological University, Singapore 637459,  
23 Singapore

24

25 <sup>1,2</sup> These authors contributed equally

26 <sup>3</sup> Current address: Syngenta, Münchwilen AG, Canton of Aargau, Switzerland

27 <sup>4</sup> Lead Contact

28

29

30 \* For correspondence: Yansong Miao (email: [yansongm@ntu.edu.sg](mailto:yansongm@ntu.edu.sg)).

31

32 **Classification**

33 BIOLOGICAL SCIENCES/ Plant Biology

34

35

## 36 **Abstract**

37 Quorum sensing (QS) is a recognized phenomenon that is crucial for regulating population-  
38 related behaviors in bacteria. However, the direct specific effect of QS molecules on host biology is  
39 largely under-studied. In this work, we show that the QS molecule DSF (*cis*-11-methyl-dodecenoic acid)  
40 produced by *Xanthomonas campestris* pv. *campestris* can suppress pathogen-associated molecular  
41 pattern (PAMP)-triggered immunity (PTI) in *Arabidopsis thaliana*, mediated by flagellin-induced activation  
42 of flagellin receptor FLS2. The DSF-mediated attenuation of innate immunity results from the alteration of  
43 oligomerization states and endocytic internalization of plasma membrane FLS2. DSF altered the lipid  
44 profile of *Arabidopsis*, with a particular increase of the phytosterol species, which impairs the general  
45 endocytosis pathway mediated by clathrin and FLS2 nano-clustering on the plasma membrane. The DSF  
46 effect on receptor dynamics and host immune responses could be entirely reversed by sterol removal.  
47 Together, our results highlighted the importance of sterol homeostasis to plasma membrane organization  
48 and demonstrate a novel mechanism by which pathogenic bacteria use their communicating molecule to  
49 manipulate PAMP-triggered host immunity.

50

51 Keywords: quorum sensing, plasma membrane, endocytosis, plant-pathogen interaction

52

## 53 **SIGNIFICANCE STATEMENT**

54 Bacteria rely on small signalling molecules called quorum sensing (QS) signals to communicate  
55 and coordinate their behaviors. QS is known to regulate gene expression, production of virulence factors,  
56 and biofilm formation for pathogenic bacteria to effectively colonize their hosts and cause diseases. In this  
57 work, we found a class of QS molecule called diffusible-signal factor (DSF), produced by devastating  
58 phytopathogenic bacteria such as *Xanthomonas* spp. and *Xylella fastidiosa*, could communicate directly  
59 with plant host and subvert plant innate immunity by inducing plant sterol production and thereby,  
60 attenuating receptor signalling through hindering the receptor clustering and plant endocytosis. The  
61 results significantly enrich our understanding of the mechanisms in the tug-of-war between bacterial  
62 pathogenesis and host immunity.

63

## 64 **INTRODUCTION**

65 Bacteria use quorum sensing (QS) to precisely coordinate population behaviors in response to  
66 various environmental cues. QS signals are small molecules that contribute to bacterial virulence in  
67 bacterial-host interactions by either regulating bacterial type III secretion or priming host immune systems  
68 (1-3). Although the contribution of quorum sensing signals to bacterial pathogenicity has been examined  
69 extensively, the direct effects of these small molecules on host biology remain under-explored.

70 QS signals produced by human pathogens, such as N-3-oxododecanoyl homoserine lactone  
71 (3OC12-HSL), modulate pathogen-associated molecular patterns (PAMPs)-mediated NF- $\kappa$ B signaling in  
72 macrophages and innate immune responses in recognition of LPS — thereby promoting persistent

73 infection (4). The 3OC12-HSL was also shown to be recognized by the bitter taste receptor, T2R family  
74 protein, T2R38 in neutrophils, lymphocytes and monocytes to activate innate immune responses (5).  
75 Similarly, plant pathogenic bacteria also secrete small-molecule virulence factors to cross-talk with host  
76 and manipulate host immunity during infection. QS molecules produced by several bacterial  
77 phytopathogens showed a wide range of interference in host development and defence mechanisms,  
78 including the root morphological development in an auxin-dependent manner or callose deposition during  
79 immune responses (6-8). However, the detailed mechanisms of how QS molecules directly influence  
80 plant host development and pathology, especially the PAMP-mediated host immunity, remains elusive.

81 Here, we studied the host-pathogen communication between host *A. thaliana* and a specific QS  
82 molecule, the diffusible signal factor (DSF). The DSF QS molecule family is produced by diverse Gram-  
83 negative bacteria, many of which are devastating phytopathogens such as *Xanthomonas campestris* pv.  
84 *campestris* (*Xcc*), *Xanthomonas oryzae* pv. *oryzae*, *Xylella fastidiosa*, as well as several human  
85 pathogens, including *Pseudomonas aeruginosa*, *Stenotrophomonas maltophilia*, and *Burkholderia*  
86 *cenoeopacia* (9). Notably, *Xanthomonas campestris* pv. *campestris* (*Xcc*), a global-threat phytopathogen  
87 that causes black rot on crucifers (10), produces up to four different analogs of DSF (*cis*-2 unsaturated  
88 fatty acids), with DSF(*cis*-11-methyl-dodecenoic acid) being the primary compound (>75%) at  
89 concentrations of 40-100  $\mu$ M during infection (11). DSF regulates the expression of *Xcc* Type III secretion  
90 system, host cell-wall macerating enzymes and other traits *in Xcc* (9, 12), and elicited host immune  
91 response associated with an enhanced *Arabidopsis PR-1* gene expression (11). However, the  
92 mechanism by which this QS molecule modulates plant defense responses is mostly unknown.

93 In this study, we investigated the mechanisms by which DSF alters host physiology and  
94 pathology. We demonstrated that DSF induces multiple macro- and microscopic changes in *A. thaliana*  
95 cell biology and development, including root morphogenesis and plant lipid profiles. The DSF-induced  
96 phytosterols production that impaired both clathrin-mediated-endocytosis (CME) for internalizing FLS2  
97 and FLS2 nano-clustering on the cell surface, which therefore desensitized *Arabidopsis* immune  
98 responses to the bacterial flagellum. Removing the DSF-induced sterol accumulation in *Arabidopsis* could  
99 reverse the defects in host endocytosis, development, and immunity caused by DSF. However, the FLS2-  
100 BAK1 interaction and MAPK activation by flg22 elicitation were unchanged, indicating uncoupled PTI  
101 responses underlying DSF immune-signalling. Our studies have significant implications for the  
102 understanding of bacterial QS molecule DSF function in host biology and host PAMP-triggered immunity  
103 (PTI) pathways.

104

## 105 RESULTS

### 106 DSF suppresses bacterial flagellin-triggered innate immune responses of *Arabidopsis*.

107 Plants have developed multiple sophisticated defense mechanisms to recognize and respond to a  
108 wide range of bacterial virulence factors. Moreover, bacterial pathogens strategically instigate or subvert  
109 the host immune response by interfering with PAMP recognition (13, 14). We asked whether DSF, a

110 recently discovered QS signal produced by diverse Gram-negative pathogens (15), could dysregulate  
111 pattern-triggered immunity (PTI) responses. We first examined *Arabidopsis* growth in response to DSF  
112 molecules within the pathological concentration of DSF during infection (11) and found that DSF inhibited  
113 primary root growth of *A. thaliana* in a dose-dependent manner without apparent effects on seed  
114 germination (Fig. S1A). To test whether DSF influences flagellin-triggered immunity, we tested several  
115 flagellin-triggered *Arabidopsis* responses in plants treated with 25  $\mu$ M of DSF, the concentration at which  
116 root growth was inhibited by 40%. We found that flg22-induced stomatal closure (aperture reduced from 4  
117  $\mu$ m to 2  $\mu$ m) was impaired by DSF treatment (Fig. 1A). Callose deposition, a plant physical defense  
118 responses to prevent pathogens infections (16), was also significantly impaired in DSF-treated seedlings  
119 (Fig. 1B) as was flg22-induced Reactive Oxygen Species (ROS) burst by half (Fig. 1C). We next  
120 performed a plant infection assay, in which *Arabidopsis* plants pre-treated with DSF or DMSO (mock)  
121 were inoculated with *Pseudomonas syringae* pv. *tomato* DC3000 (*Pst* DC3000). The use of a non-DSF-  
122 producing bacterium here (*Pst* DC3000) was to differentiate the direct effect of DSF on plant immunity vs.  
123 the effect of DSF through the activation of the bacterial Type III secretion system and other traits  
124 regulated by QS, which would otherwise be difficult to dissect as DSF-deficient or overproducing mutants  
125 are less virulent on plants. In this assay which involved using live bacteria with all the potential PAMPs,  
126 we found that DSF-treated plants were colonized by a higher number of *Pst* DC3000 cells compared to  
127 control plants, indicating a higher susceptibility of plants to *Pst* infection in the presence of DSF (Fig. 1D).  
128 We further examine the ability of this QS molecule in compromising the defense mechanism of the plants  
129 that were pre-protected by PTI-signaling. In treatments where plants were primed with flg22 peptide  
130 before bacterial inoculation, we found that DSF application prior to flg22 priming significantly lowered  
131 flg22-induced protection against infection, reflected in a higher bacterial population in DSF+flg22  
132 treatment compared to that of DMSO+flg22 treatment (Fig. 1D-E).

### 133 **DSF interferes with the host endocytic internalization on the plasma membrane without** 134 **compromising MAPK signaling**

135 We next sought to investigate if DSF could interfere with the dynamics and functions of the  
136 *Arabidopsis* flagellin receptor FLS2 (16). Flagellin binding leads to conformational changes in the FLS2  
137 receptor and triggers its oligomerization (17) and endocytic internalization to activate the innate immunity  
138 cascade (18, 19).

139 We first tested whether DSF affects FLS2 endocytosis upon elicitation with its corresponding  
140 ligand flg22. Upon treatment of flagellin peptide flg22 but not flgII-28, FLS2 endocytic internalisation was  
141 evidenced by the appearance of punctate endosomes after around 60-75 min and replenishment of  
142 FLS2-GFP back to the plasma membrane (PM) at 120 min post elicitation (Fig. 2A and Fig. S1B) (18, 20,  
143 21). In contrast, when FLS2-GFP seedlings were treated with DSF for 24 h prior to flg22 exposure, we  
144 observed an apparent delay in FLS2 internalization upon PAMP elicitation. After 60 mins of flg22  
145 elicitation, DSF-treated plants showed fewer FLS2-positive endosomes compared to DMSO-treated  
146 plants, indicating the attenuated endocytosis of FLS2. We then asked whether the attenuated FLS2

147 endocytosis could also lead to a delay in FLS2 degradation (22, 23). Consistent with a previous  
148 observation (24), we found that FLS2 degradation occurred approximately 30 min after peptide elicitation  
149 and this response was similarly delayed in DSF pre-treated seedlings (Fig. S1C).

150 To quantitatively determine the DSF-caused defects in receptor endocytosis, we examined the  
151 FLS2 endocytic internalization at the plasma membrane (PM) using variable-angle epifluorescence  
152 microscopy (VAEM) (Fig. 2B). From VAEM micrographs, we quantitatively determined receptor  
153 internalisation by kymograph analysis of FLS2-GFP puncta. We observed that flg22 enhanced FLS2  
154 endocytosis as shown by the shortened lifetime of FLS2 on the plasma membrane, and this enhancement  
155 was blocked by DSF pre-treatment prior to peptide elicitation (Fig. 2C). As FLS2 is endocytosed via  
156 clathrin-mediated endocytosis (CME) (20), we then tested whether the delay in FLS2 endocytosis was  
157 due to a general inhibition of CME. Indeed, we observed a significant increase in the lifetime of clathrin-  
158 light-chain (Fig. S2A), as well as the lifetime of several typical CME-dependent endocytic receptor:  
159 brassinosteroid receptor BRI1 and Boron receptor BOR1 under DSF treatment (Fig. S2B-C), indicating  
160 the impaired endocytic internalization of these PM receptors.

161 Unexpectedly, although DSF delayed FLS2 degradation and recycling due to the impaired CME  
162 (Fig. S1C), we did not observe a noticeable change in the acute response of MAPK phosphorylation,  
163 which occurs approximately 15 min post-elicitation and returns to basal level within 60 min (Fig. S1D).  
164 This result suggests that flg22-induced MAPK activation is independent of FLS2 endocytosis under DSF-  
165 signalling, which is consistent with the unchanged *FRK1* up-regulation in the presence of flg22 (Fig. S1E)  
166 that is through the activation of a MAPK signalling cascade (25). Exposure to flg22 could still induce the  
167 expression of *FRK1* in DSF-treated seedlings, suggesting that DSF did not have a significant effect on  
168 *FRK1*-related pathway and might not influence FLS2-BAK1 heterodimerization that was critical for *FRK1*  
169 induction (26). In agreement with this observation, we also found that DSF did not affect the flg22-induced  
170 FLS2-BAK1 heterodimerization (Fig. S1F), suggesting that the inhibition of flg22-induced ROS burst by  
171 DSF is unlikely a direct consequence of disturbed FLS2-BAK1 complex formation, and uncoupled from  
172 MAPK activation.

### 173 **DSF impairs lateral nano-clustering of FLS2 on the plasma membrane**

174 In addition to the endocytic internalization that removes material from the plasma membrane, the  
175 lateral nano-clustering of plasma membrane-bound receptors through multivalent interactions is well-  
176 known to mediate diverse signal transduction mechanisms during host-pathogen interactions (27; 28).  
177 The self- or hetero-oligomerization of surface receptors are critical for receptor activation, signal  
178 amplification, and signal transduction in both plants and human, such as the brassinosteroid receptor  
179 BRI1 (29), chitin receptor *AtCERK1* (30), EGF receptor (31, 32) or insulin receptor IR/IGFR (33). To  
180 further investigate DSF-induced effects on receptor lateral dynamics and their activity, we performed  
181 living cell imaging of FLS2-GFP, chosen from several DSF hindered endocytic PM receptors (Fig. 2C, Fig.  
182 S2B-C). FLS2 formed heterogeneous PM clusters with or without ligand activation (Fig. 2B), representing  
183 the resting- or activated- states, respectively (34). The formation of FLS2-BAK1 heterodimer upon flg22

184 elicitation is a key step in activating downstream defense signaling (35, 36). Besides the FLS2-BAK1  
185 interaction, an increase in FLS2-FLS2 self-oligomerization is also important for FLS2 phosphorylation and  
186 signal transduction (37). Though DSF did not influence flg22-triggered FLS2-BAK1 interaction and MAPK  
187 activation (Fig. S1D,F), the fact that DSF impaired the ROS production suggested uncoupled  
188 mechanisms in the activation of MAPK and the ROS production by potential using differential inter- or  
189 intra-protein interactions of FLS2 for these processes. Consistently, with a DSF pre-treatment, FLS2  
190 clusters became more diffused with a lower spatial-clustering index (SCI) after 60 min of flg22 elicitation  
191 (Fig. 2D).

192 To study the detailed physical interactions of FLS2 receptors in the multivalent nanoclusters, we  
193 took advantage of a well-established living cell imaging approaches in studying mammalian receptor  
194 clustering and activation (38, 39). We quantitatively measured the lateral self-interaction of FLS2 on the  
195 plasma membrane directly under ligand activation by performing FRET between identical fluorophores  
196 (homo-FRET) coupled with VAEM, which allows sensitive measurement of fast cargo-induced receptor  
197 activation (40). In this method, homo-oligomerization of FLS2-GFP will be accompanied by a reduction of  
198 fluorescence emission anisotropy of FLS2-GFP when it is excited by polarized light. We determined the  
199 steady-state fluorescence emission fluorescence anisotropy of FLS2-GFP with or without 5 minutes of  
200 peptide elicitation (Fig. 2E, Fig. S2D,E). Flg22 stimulated a significant decrease in anisotropy of FLS2-  
201 GFP, reflecting the flg22-induced oligomerization of FLS2. However, DSF-treated plants showed a  
202 reduction of flg22-triggered anisotropy change, indicating a suppressed formation of homo-oligomer  
203 (active) from homo-dimer states (unstimulated) (41). Seedlings exposed to DSF did not exhibit any  
204 significant change in emission anisotropy of FLS2 after flg22 elicitation (compared to DMSO+flg22  
205 control,  $p>0.05$ ) (Fig. 2E), consistent with SCI analysis (Fig. 2D).

206 We next investigated the effects of DSF on bulk endocytosis using the lipophilic dye FM4-64 and  
207 CME using transgenic plant expressing PIN2-GFP (42). Briefly, we monitored the uptake of FM4-64 in  
208 *Arabidopsis* seedlings expressing PIN2-GFP, an auxin efflux carrier protein and a CME-dependent cargo  
209 (43) in the presence of the novel small-molecule inhibitor ES9-17, which specifically binds to clathrin  
210 heavy-chain without protonophoric effect (44, 45). To test whether DSF would influence CME further on  
211 top of a partially-compromised CME by small molecular inhibitors (46), we pre-treated PIN2-GFP  
212 seedlings with DMSO/DSF and then, performed pharmacological studies with different combinations of  
213 ES9-17/BFA on treated plants, using FM4-64 dye as an indicator of bulk endocytosis. Our result indicated  
214 that while neither DSF nor 50  $\mu$ M ES9-17 completely blocked the internalization of FM4-64 dye, a  
215 combined treatment of DSF and ES9-17 totally inhibited FM4-64 uptake, indicated by the absence of  
216 intracellular FM4-64 signal and FM4-64-containing BFA bodies in BFA treatment (Fig. 3A-D). Our results  
217 demonstrated the additional attenuation of bulk-phase endocytosis by DSF on top of the CME inhibitor  
218 ES9-17.

219 We then asked whether such impairment of plant CME could also disrupt endosomal transport  
220 after endocytic invagination from the plasma membrane. We examined the intracellular membrane

221 compartments of the protein sorting and endosomal transport pathways upon DSF treatment. No  
222 noticeable ultrastructural changes were observed in early endosome/trans-Golgi network (VHA-a1), late  
223 endosome/multivesicular body (MVB) (RabF2b), and Golgi (Got1p homolog), nor in their response to  
224 Brefeldin A (BFA) or Wortmannin that induce Golgi aggregation or MVB dilation (47), respectively (Fig.  
225 S3A-D). The above results suggest that DSF likely impairs plant endocytosis mainly at the step of  
226 endocytic internalization on the plasma membrane and not at the endomembrane trafficking steps.

227

## 228 **DSF increased host phytosterol contents and reprogramed *Arabidopsis* lipid metabolism**

229 Dynamic behaviors of PM proteins, including the endocytic invagination, lateral diffusion, and  
230 inter-molecular interactions, rely on the lipid-compartmentalization and a balanced sterol composition of  
231 the plasma membrane (39, 48). We next sought to determine if the lipid profile of *Arabidopsis* was also  
232 altered by DSF, given that this QS signal is a short-chain fatty acid-like molecule that could serve as a  
233 building block to create diverse biologically active molecules (2). Our targeted lipidomic profiling of  
234 *Arabidopsis* seedlings revealed that *Arabidopsis* seedlings grown on DSF-supplemented medium had a  
235 comprehensive shift in a wide range of lipid compounds compared to those grown on control medium  
236 (Fig. 3E-F; Dataset S1-2). Interestingly, the most notable changes were observed in several acyl sterol  
237 glycosides (ASGs), of which the most abundant phytosterols: sitosterol, campesterol, and stigmasterol  
238 showed an increase by 2-4 folds. Sterols regulate a wide range of cellular processes, such as lipid  
239 metabolism and cell membrane dynamics, such as the formation of membrane microdomains (49, 50).  
240 We, therefore, tested whether the increased sterol content could explain the DSF-induced phenotypes by  
241 treating *Arabidopsis* seedlings with Methyl- $\beta$ -cyclodextrin ( $M\beta CD$ ) in combination with DSF.  $M\beta CD$  is a  
242 widely-used sterol-depleting compound that acts strictly at the membrane surface by binding to sterol with  
243 high-affinity and remove sterol acutely within minutes, with demonstrated success in acute depletion of  
244 sterols in both plant and animal cells (51-55). Here, we found that  $M\beta CD$  fully blocked the DSF-induced  
245 inhibition of primary roots and root hairs, suggesting DSF's opposite effects compared to  $M\beta CD$  on sterol  
246 perturbation in *Arabidopsis*. Consistent with this result, culturing seedlings in the presence of both  $M\beta CD$   
247 and DSF completely abolished the DSF-triggered increase of lipid components, including phytosterols.  
248 The total quantity of measured sterols content in  $M\beta CD$  and  $M\beta CD$ +DSF treatment were reduced to  $92.4$   
249  $\pm 10.3$  nmol.g<sup>-1</sup> and  $76.0 \pm 10.4$  nmol.g<sup>-1</sup> respectively, compared to  $138.2 \pm 24.6$  nmol.g<sup>-1</sup> in DMSO  
250 treatment and  $366.3 \pm 121.1$  nmol.g<sup>-1</sup> in DSF treatment, showing a dominant effect of  $M\beta CD$  over DSF  
251 (Fig. 3F).

252 To further examined the role of phytosterols in DSF-induced inhibition of primary root growth, we  
253 performed growth assay on several *Arabidopsis* mutants of the sterol biosynthesis pathway (Fig. 3G) in  
254 the presence of DSF. The *smt1-1* and *fk-X224* mutants were chosen for this experiment as their growth  
255 defects are less severe compared to other sterol mutants. Primary root growth of *smt1-1* mutant  
256 (defective in C-24 methyltransferase) and the *fackel* (*fk*) mutant *fk-X224* (defective in sterol C-14  
257 reductase), which are two key early steps of sterol biosynthetic pathway upstream of the branch point

258 (56) (Fig. S3E), showed significantly reduced sensitivity to DSF, as represented by a lower inhibition rate  
259 compared to their corresponding wild-type ecotypes (Fig. 3G, Fig. S3F). Together, these findings support  
260 our hypothesis that DSF regulates host development through altering host phytosterols content.

### 261 **Sterols regulation of lipid microdomain assembly and endocytosis phenocopies DSF function in** 262 ***Arabidopsis***

263 As we observed that M $\beta$ CD and DSF have opposite effects on *Arabidopsis* lipidomic profiles in  
264 the long-term plant growth assay, we next examined whether an acute sterol removal by M $\beta$ CD would  
265 restore other DSF-induced phenotypes on plant endocytosis and innate immune responses of  
266 *Arabidopsis*. In the experiments testing DSF perturbation of PTI, following M $\beta$ CD pre-treatment, the  
267 number of FLS2-positive endosomes in FLS2-GFP plants pre-treated with DSF increased significantly at  
268 60 min after elicitation with flg22, even though M $\beta$ CD itself strongly inhibited FLS2 trafficking into  
269 endosomes (Fig. 4A). In line with this finding, M $\beta$ CD also restored the bulk endocytosis of FM4-64 dye  
270 that was blocked by the combined treatment of DSF and ES9-17, represented by the similar ratio of  
271 intracellular/PM signal intensity and BFA bodies area between DMSO and ES9-17 treatment in the  
272 DSF+M $\beta$ CD pre-treated seedlings (Fig. 4B and Fig. S4A), the delay of CLC lifetime (Fig. S4B), and the  
273 DSF-induced inhibition of ROS burst (Fig. 4C).

274 We further asked whether the supplementation of phytosterols could phenocopy the DSF-induced  
275 defects in CME and flg22-activated FLS2 internalization. We found that exogenous phytosterol mix  
276 (Sitosterol: Stigmasterol: Campesterol=8:1:1) treatment phenocopied DSF-induced inhibition of flg22-  
277 stimulated ROS production and subsequent M $\beta$ CD supplement reversed the sterol-inhibited endocytosis  
278 of FM4-64 dye in the presence of ES9-17 (Fig. S4C-D), FLS2 internalization into endosomes (Fig. S5A),  
279 as well as flg22-triggered ROS burst (Fig. S5B). Similar to the sterol depleting compound M $\beta$ CD, we  
280 observed that Lovastatin— a sterol biosynthesis inhibitor— also rescued ROS burst in DSF-treated  
281 leaves (Fig. S5C), suggesting that the DSF-induced inhibition of ROS and innate immunity was likely due  
282 to the incorporation of DSF into phytosterol metabolic pathways or induction of sterol production via an  
283 unknown mechanism. Similar inhibitions of plant root growth were also observed with the predominant  
284 sterol  $\beta$ -sitosterol:  $\beta$ -Sitosterol could also inhibit root growth in a dose-dependent manner similar to DSF,  
285 and this inhibition could also be reverted by M $\beta$ CD treatment (Fig. S5D-E). Together, these data suggest  
286 that a balance in sterol composition of the plant PM is crucial for plant CME as well as the pattern-  
287 recognition receptors (PRRs)-mediated defense responses.

### 288 **DSF and Sterol interfere with lateral membrane compartmentalization and FLS2-nanoclustering**

289 Lipids composition, compartmentalization, and surface tension of plasma membrane are critical  
290 physicochemical properties in regulating lateral motility, protein-protein interaction, and distribution of  
291 immune receptors, including FLS2 (28, 57). Sterols are essential constituents of the liquid-ordered ( $L_o$ )  
292 lipid nanodomains and influence membrane flexibility (58). We, therefore, asked whether the DSF-  
293 induced phytosterol increase influences the compartmentalization of PM by imaging nanodomain-marker



294 YFP:REM1.2 *Arabidopsis* expressing YFP:REM1.2 treated with DSF, a phytosterol mix (sitosterol:  
295 stigmasterol: campesterol=8:1:1) or M $\beta$ CD were examined via super-resolution 2D-Structured Illumination  
296 Microscopy (2D-SIM). M $\beta$ CD resulted in a significant reduction of the mean intensity of YFP:REM1.2-  
297 marked microdomains, suggesting a reduction in the ordered-phase. The presence of either DSF or  
298 exogenous sterol could similarly reverse the M $\beta$ CD effect in lipid compartmentalization (Fig. 5A-B).  
299 Furthermore, with M $\beta$ CD post-treatment, DSF no longer attenuated the homo-oligomerisation of FLS2  
300 upon flg22-elicitation, indicated by an anisotropy reduction in living cell homo-FRET imaging (Fig. 5C-D).

### 301 **Osmotic stress rescued DSF-induced inhibition of *Arabidopsis* endocytosis**

302 Lipid order increase and microdomain assembly deform the organization of local plasma  
303 membrane and thus, alter the line tension of phase-separated PM, which are physical cues in regulating  
304 endocytosis and lateral molecular dynamics (48, 59, 60). We were therefore motivated to ask whether  
305 osmotic stress, which induces plant PM remodelling (48), could reverse the inhibition of endocytosis  
306 caused by DSF. To test if osmotic stress could restore the inhibition of endocytosis and plant growth  
307 caused by DSF, we measured primary root length from seedlings grown in combination with different  
308 concentrations of osmolytes (NaCl or Mannitol) and DMSO/DSF. We observed a partial recovery of DSF-  
309 induced inhibition on primary root growth at 10 and 50 mM NaCl, but not with Mannitol (Fig. S6A).  
310 Consistent with this result, flg22-induced internalization of the FLS2 receptor in seedlings, which were  
311 incubated with 100 mM NaCl following DSF treatment, could also be observed as early as 30 min after  
312 peptide elicitation (Fig. S6B). The differential recovery in root growth by Mannitol and NaCl treatments  
313 suggested that while their alteration of PM tension reverts the DSF-attenuated endocytosis similarly, ionic  
314 and non-ionic osmolytes may have different mechanisms to achieve a full reversal of root development  
315 under DSF-signaling.

316

### 317 **DISCUSSION**

318 Hosts and symbionts constantly exchange small metabolites during interkingdom interactions. For  
319 example, the plant pathogenic bacterium *Pseudomonas syringae* produces the phytotoxin coronatine to  
320 target multiple plant immunity pathways, including stomatal defence, thus facilitate bacterial entry as well  
321 as disease development (61-64). Conversely, the transfer of small molecules from plants to microbes is  
322 also an integral part of microbial symbiotic relationships (65, 66).

323 During host-pathogen interaction, bacteria mainly rely on quorum sensing to regulate the  
324 expression of virulence genes necessary for colonization and pathogenesis or to switch between different  
325 lifestyles (67-69). Numerous reports highlighted the effects of QS molecules on plant development and  
326 immunity, but mechanistic insights on how bacterial QS molecules specifically interfere with host biology  
327 remain sparse (70). Distinctive acylation and hydroxylation patterns in bacterial metabolites have been  
328 suggested as a molecular signature of AHL QS family to regulate host immune responses (71, 72). For  
329 example, medium-chained 3-hydroxy fatty acids directly bind and trigger the phosphorylation of

330 LIPOOLIGOSACCHARIDE-SPECIFIC REDUCED ELICITATION (LORE) receptor kinase, leading to  
331 activation of cytoplasmic receptor-like kinases and stimulate *FRK1* expression (71, 73). Here, we  
332 unravelled a different mechanism by which a unique QS molecule called DSF regulates host biology by  
333 perturbing host phytosterol homeostasis. Unglycosylated sterols and glycosylated sterols (including steryl  
334 glycosides and acyl sterol glycosides) are integral components of the plant plasma membranes,  
335 especially in membrane microdomains (50, 74). The increase in host acyl-glycosylated phytosterols by  
336 DSF treatment shown in our targeted lipidomic analysis might be a consequence of direct sterol  
337 modifications – such as DSF being metabolized to a precursor of acyl source for steryl glucoside  
338 acyltransferase (75), or from a potential sterol exchange between PM and ER through PM-ER contact  
339 sites (76, 77) — both of which require further investigation. Through the modulation of sterols, DSF  
340 interferes with plant PTI through the alteration of both the clustering and endocytic internalization of the  
341 surface receptors. Compared to untreated plants, DSF-treated plants display an apparent increase in total  
342 phytosterol by >2.5 fold, as well as slight enhancement in several other lipid species that are PM  
343 structural constituents, such as glycerolipids (PC, PE, PG, and PS) and sphingolipids (ceramides) (78-  
344 80). Phosphatidylserine (PS) is known to play an essential function in surface membrane  
345 compartmentalization and protein clustering (81, 82). Thus, how the changes of phytosterols and PS by  
346 DSF tune the PM mechanical properties is worth of future studies via artificial lipid bilayer-based assays  
347 and membrane modelling.

348 The diverse roles of QS molecules from pathogenic bacteria in both regulating bacterial responses and  
349 modulating host biology reflect a direct co-evolution between hosts and pathogens according to the Zig-  
350 zag model (83). *Xcc* DSF gradually accumulates during infection and can reach substantial  
351 concentrations (hundred micromolar amount) at later stages of disease (11), similar to QS molecules from  
352 other bacteria (84). A previous report demonstrated that at high concentrations (e.g. 100  $\mu$ M), DSF acts  
353 as a hypersensitive reaction (HR) elicitor evident by cell-death response and excessive callose deposition  
354 (11). Here, we found that at low concentrations (e.g. 25  $\mu$ M), which is more relevant to the early stages of  
355 infection, this QS signal seems to regulate a specific branch of plant PTI responses through the  
356 modulation of molecular dynamics of PRRs on the PM. These findings of plant responses to low dose and  
357 the high dose of DSF treatments are not necessarily conflicting to each other as they represent different  
358 stages of plant immune responses over the accumulation of bacterial DSF during disease development.  
359 In addition, the high-dose DSF-induced plant HR could also be masked by bacterial extracellular  
360 polysaccharide during plant colonization, demonstrating the constant bidirectional interaction between  
361 plant and bacteria (11). Taken together, these above results reflect the dynamic change in balancing the  
362 tug-of-war over the accumulation of DSF molecules during bacterial infection. Although we found that  
363 DSF did not directly alter PAMP-activated MAPK signaling, heterodimerization of FLS2-BAK1, or *FRK1*  
364 expression, this QS molecule did compromise the PAMP-triggered ROS production. Such different DSF-  
365 mediated host signalling demonstrates the uncoupled mechanisms of MAPK activation and ROS  
366 production upon flg22-elicitation, in which ROS production was attenuated by DSF/sterol while activation

367 of MAPK cascade remained. As a result of a functional MAPK cascade, DSF could only reduce but not  
368 entirely abolish the flg22-induced defense responses (Fig. 1D-E). FLS2-BAK1 may not be the only rate-  
369 limiting components of the defense signaling cascade as *bak1* null mutants still retain a certain level of  
370 MAPK and ROS responses (85), and FLS2-BAK1 association could be uncoupled from MAPK activation  
371 as previously shown with the flg22 G/A mutant peptide (26). Similarly, in chitin-mediated PTI, AtCERK1-  
372 mediated MAPK-activation and ROS production were also found to be distinctly regulated by receptor-like  
373 cytoplasmic kinases (RLCK) PBL27 and BIK1, respectively (86; 87). These observations suggest  
374 potential heterogeneity in receptor coupling and distinct constituents in receptor clusters that may convey  
375 differential immune-response by recruiting different PTI signaling molecules. Similar scenarios have also  
376 been observed in the mammalian innate immune system (88). The FLS2 binding-partners for MAPK and  
377 ROS signaling have differential sensitivity to DSF/sterol-induced perturbation of PM, indicating their  
378 possibly different affinity or participation in nanodomains and FLS2-nanoclusters during PRRs signaling.  
379 Consistently, due to the active involvement in the high-ordered membrane domain of NADPH oxidase  
380 proteins, the NADPH oxidase activity has also been reported to be highly sensitive to plant sterol changes  
381 (89). The decline of ROS burst under DSF-signaling might also be through the change in signaling  
382 competency of other components downstream of FLS2 and BAK1, such as BIK1, BSK1 or heterotrimeric  
383 G protein subunits; or the function of the membrane-bound RBOHD itself (90; 91; 92; 93; 94). Of note, the  
384 loss-of-function alleles of some of these components have also been documented to affect the flg22-  
385 induced ROS burst but not MAPK activation (90; 91; 92; 95).

386         Increasing evidence supports the roles of membrane microdomains in host innate immunity by  
387 regulating surface receptor dynamics in and out of microdomains on plasma membrane upon ligand-  
388 recognition, subsequent receptor interactions, and innate immunity activation (27; 96; 97). For instance,  
389 disruption of PM continuity is competent enough to abolish the signaling carried out by multiple PM  
390 receptors (BRI1, FLS2, EGFR) (28, 98). Similar to many other immune-receptors (99), unstimulated  
391 *Arabidopsis* FLS2 could be in a dimer form (41). Our living cell homo-FRET approach allowed us to  
392 quantitatively measure the dynamic formation of the nanoclusters of plant surface molecules (39). Homo-  
393 FRET experiments revealed that flagellin triggered the nano-clustering of FLS2 from a less to more  
394 oligomerized, representing a transition from the unstimulated to active state during early immune  
395 responses.

396         Our data suggest a plausible model (Fig. 6) in which the *Xcc* QS molecule DSF alters sterols  
397 composition to modulate membrane microdomains and thereby, affects both the general endocytosis  
398 pathway as well as FLS2 receptor nano-clustering upon PAMP stimulation, and thus the ROS production  
399 (100). Sterols, together with sphingolipids, are major constituents of plasma membrane lipid  
400 raft/microdomains that are formed by diverse mechanisms of molecular assemblies of surface molecules  
401 (100-102). Distinct microdomains spatially separate from each other and their assembly and distributions  
402 are of significant importance for the regulation of diverse cellular processes, including the nano-clustering  
403 or CME of surface signaling factors (41, 103, 104). In agreement with this model and our data, sterol

404 content has previously been found to directly or indirectly influence membrane organization and CME (41,  
405 58, 104, 105). CME is well-known to coordinate PTI signaling in plants 106. However, as ligand-induced  
406 MAPK activation (~5-30 min post elicitation) is detected earlier than the appearance of endocytosis-  
407 mediated PRR-accumulation in endosomes (~30 min-1 h post elicitation) (18, 26) (Fig. 2A), endocytic  
408 invagination per se might not be a direct mediator for MAPK activation (24), which is also supported by  
409 the fact here that an attenuated-endocytosis by DSF did not alter flg22-mediated MAPK activation.  
410 Nevertheless, the impairment of endocytosis could still influence the internalization and recycling of the  
411 surface PRRs at different oligomerization states upon PAMP-elicitation (24, 107). Consistent with this  
412 notion, recent work also highlighted many consequences of the CME impairment in the *Arabidopsis*  
413 clathrin mutant *chc2*, such as FLS2 endocytosis, stomatal defense, callose deposition, as well as  
414 increased susceptibility to bacterial infection, while acute MAPK response remained intact (20).

415 During bacterial propagation from early- to late- stages of infection, DSF attenuates the  
416 continuous enhancement of the host PTI responses in ROS production that could otherwise be stimulated  
417 by the increasing amount of PAMPs. Receptor activities in both lateral motility for nano-clustering or  
418 internalization for receptor recycling on the plasma membrane are compromised by DSF signalling. Our  
419 report emphasizes the role of QS molecules beyond intraspecies communication, which has important  
420 implications for plant disease control (3). It will also be of particular interest to investigate if the regulation  
421 of host metabolic pathways by different small molecules from pathogens is a ubiquitous phenomenon  
422 during host-pathogen interaction. In addition, since quorum-sensing molecules from human pathogens,  
423 such as *P. aeruginosa* have also been documented to disrupt host membrane microdomains (72), it is  
424 worth future studies to investigate whether signalling of plasma membrane receptors such as TLR5 (an  
425 ortholog of FLS2) is also affected by such molecule in a sterol-dependent manner.

426

## 427 **ACKNOWLEDGEMENTS**

428 We are grateful to Kimberly Kline (Singapore Centre for Environmental Life Sciences  
429 Engineering, Singapore) for the critical reading of the manuscript. We thank Lay Yin Tang and Alma  
430 Turšić-Wunder for helping in RNA preparation. We thank the following researchers for sharing the  
431 *Arabidopsis* seeds: Takashi Ueda (National Institute for Basic Biology, Japan) for the FLS2-GFP  
432 *Arabidopsis*, Jianwei Pan (Lanzhou University, China) for PIN2-GFP *Arabidopsis*, Liwen Jiang (Chinese  
433 University of Hongkong) for the VHAA1-GFP line, and Thomas Ott (University of Freiburg) for the  
434 pREM1.2::YFP:REM1.2 line; Kathrin Schrick (Kansas State University), Jyan-Chyun Jang (Ohio State  
435 University) for the *Arabidopsis* sterol mutants; and Jinbo Shen (State Key Laboratory of Subtropical  
436 Siviculture, Zhejiang A&F University, China) for the BOR1-GFP line. We also thank Yinyue Deng (South  
437 China Agricultural University, China) for sharing reagents, M. K. Mathew and Divya Rajagopal (National  
438 Centre for Biological Sciences- TIFR, India) for helping with *Arabidopsis* growth for the Homo-FRET  
439 experiments. SM is supported by a Margdarshi Fellowship (IA/M/15/1/502018) from the DBT-Wellcome

440 Trust Alliance. This study was supported by NTU NIMBELS (NIM/01/2016) and NTU startup grant  
441 (M4081533) to Y.M. in Singapore.

442

443 **Contributions**

444 T.M.T., Z.M., and Y.M. conceived and designed the study. T.M.T. and Z.M. performed most of the  
445 plant-based experiments. T.M.T., A.T., and F.T. performed lipidomics analysis and interpreted the data.  
446 Z.M. and S.N. performed homo-FRET based imaging, image analysis, and data interpretation. Y.C helped  
447 with the quantitative RT-PCR and data analysis. X.H. and J.W. performed the EM works. B.G. and J.L.  
448 performed the CoIP experiment. F.T., M.R., S.M., J.L., and L.Y. provided essential intellectual input and  
449 data interpretation. T.M.T. and Y.M. wrote the manuscript with feedback from all authors. Y.M. supervised  
450 the study.

451

452 REFERENCES

- 453
- 454 1. A. K. Brock *et al.*, The Arabidopsis mitogen-activated protein kinase phosphatase PP2C5 affects
- 455 seed germination, stomatal aperture, and abscisic acid-inducible gene expression. *Plant Physiol.*
- 456 **153**, 1098-1111 (2010).
- 457 2. S. Chatterjee, C. Wistrom, S. E. Lindow, A cell–cell signaling sensor is required for virulence and
- 458 insect transmission of *Xylella fastidiosa*. *Proceedings of the National Academy of Sciences* **105**,
- 459 2670-2675 (2008).
- 460 3. K. L. Newman, R. P. Almeida, A. H. Purcell, S. E. Lindow, Cell-cell signaling controls *Xylella*
- 461 *fastidiosa* interactions with both insects and plants. *Proc. Natl. Acad. Sci. U.S.A.* **101**, 1737-1742
- 462 (2004).
- 463 4. V. V. Kravchenko *et al.*, Modulation of gene expression via disruption of NF- $\kappa$ B signaling by a
- 464 bacterial small molecule. *Science* **321**, 259-263 (2008).
- 465 5. S. Maurer *et al.*, Tasting *Pseudomonas aeruginosa* biofilms: human neutrophils express the bitter
- 466 receptor T2R38 as sensor for the quorum sensing molecule N-(3-oxododecanoyl)-L-homoserine
- 467 lactone. *Front. Immunol.* **6** (2015).
- 468 6. A. Schikora *et al.*, N-acyl-homoserine lactone confers resistance toward biotrophic and
- 469 hemibiotrophic pathogens via altered activation of AtMPK6. *Plant Physiol.* **157**, 1407-1418
- 470 (2011).
- 471 7. X. Bai, C. D. Todd, R. Desikan, Y. Yang, X. Hu, N-3-oxo-decanoyl-L-homoserine-lactone
- 472 activates auxin-induced adventitious root formation via hydrogen peroxide- and nitric oxide-
- 473 dependent cyclic GMP signaling in mung bean. *Plant Physiol.* **158**, 725-736 (2012).
- 474 8. Q. Zhao *et al.*, Involvement of calmodulin in regulation of primary root elongation by N-3-oxo-
- 475 hexanoyl homoserine lactone in *Arabidopsis thaliana*. *Frontiers in plant science* **5**, 807 (2015).
- 476 9. L. Zhou, L.-H. Zhang, M. Cámara, Y.-W. He, The DSF family of quorum sensing signals: diversity,
- 477 biosynthesis, and turnover. *Trends Microbiol.* **25**, 293-303 (2017).
- 478 10. D. Meyer, E. Lauber, D. Roby, M. Arlat, T. Kroj, Optimization of pathogenicity assays to study the
- 479 *Arabidopsis thaliana*–*Xanthomonas campestris* pv. *campestris* pathosystem. *Mol. Plant Pathol.* **6**,
- 480 327-333 (2005).
- 481 11. A. Kakkar, N. R. Nizampatnam, A. Kondreddy, B. B. Pradhan, S. Chatterjee, *Xanthomonas*
- 482 *campestris* cell–cell signalling molecule DSF (diffusible signal factor) elicits innate immunity in
- 483 plants and is suppressed by the exopolysaccharide xanthan. *J. Exp. Bot.* **66**, 6697-6714 (2015).
- 484 12. L. Zhou *et al.*, The multiple DSF-family QS signals are synthesized from carbohydrate and
- 485 branched-chain amino acids via the FAS elongation cycle. *Scientific reports* **5** (2015).
- 486 13. P. He *et al.*, Specific bacterial suppressors of MAMP signaling upstream of MAPKKK in
- 487 *Arabidopsis* innate immunity. *Cell* **125**, 563-575 (2006).
- 488 14. J. Zhang *et al.*, A *Pseudomonas syringae* effector inactivates MAPKs to suppress PAMP-induced
- 489 immunity in plants. *Cell host & microbe* **1**, 175-185 (2007).
- 490 15. R. P. Ryan, S.-q. An, J. H. Allan, Y. McCarthy, J. M. Dow, The DSF family of cell–cell signals: an
- 491 expanding class of bacterial virulence regulators. *PLoS Pathog* **11**, e1004986 (2015).
- 492 16. L. Gómez-Gómez, T. Boller, FLS2: An LRR receptor–like kinase involved in the perception of the
- 493 bacterial elicitor flagellin in *Arabidopsis*. *Molecular Cell* **5**, 1003-1011 (2000).
- 494 17. D. Lu *et al.*, A receptor-like cytoplasmic kinase, BIK1, associates with a flagellin receptor complex
- 495 to initiate plant innate immunity. *Proceedings of the National Academy of Sciences* **107**, 496-501
- 496 (2010).
- 497 18. S. Robatzek, D. Chinchilla, T. Boller, Ligand-induced endocytosis of the pattern recognition
- 498 receptor FLS2 in *Arabidopsis*. *Genes & development* **20**, 537-542 (2006).
- 499 19. M. Beck, J. Zhou, C. Faulkner, D. MacLean, S. Robatzek, Spatio-temporal cellular dynamics of
- 500 the *Arabidopsis* flagellin receptor reveal activation status-dependent endosomal sorting. *The*
- 501 *Plant Cell* **24**, 4205-4219 (2012).
- 502 20. M. Mbengue *et al.*, Clathrin-dependent endocytosis is required for immunity mediated by pattern
- 503 recognition receptor kinases. *Proceedings of the National Academy of Sciences* **113**, 11034-
- 504 11039 (2016).

- 505 21. S. R. Hind *et al.*, Tomato receptor FLAGELLIN-SENSING 3 binds flgII-28 and activates the plant  
506 immune system. *Nature Plants* **2**, 16128 (2016).
- 507 22. D. Scheuring *et al.*, Ubiquitin initiates sorting of Golgi and plasma membrane proteins into the  
508 vacuolar degradation pathway. *BMC Plant Biol.* **12**, 164 (2012).
- 509 23. S. Ben Khaled, J. Postma, S. Robatzek, A moving view: subcellular trafficking processes in  
510 pattern recognition receptor-triggered plant immunity. *Annu. Rev. Phytopathol.* **53**, 379-402  
511 (2015).
- 512 24. J. M. Smith, D. J. Salamango, M. E. Leslie, C. A. Collins, A. Heese, Sensitivity to Flg22 is  
513 modulated by ligand-induced degradation and *de novo* synthesis of the endogenous flagellin-  
514 receptor FLAGELLIN-SENSING2. *Plant Physiol.* **164**, 440-454 (2014).
- 515 25. T. Asai *et al.*, MAP kinase signalling cascade in *Arabidopsis* innate immunity. *Nature* **415**, 977-  
516 983 (2002).
- 517 26. Y. Sun *et al.*, Structural basis for flg22-induced activation of the Arabidopsis FLS2-BAK1 immune  
518 complex. *Science* **342**, 624-628 (2013).
- 519 27. P. Liang *et al.*, Symbiotic root infections in *Medicago truncatula* require remorin-mediated  
520 receptor stabilization in membrane nanodomains. *Proceedings of the National Academy of*  
521 *Sciences* **115**, 5289-5294 (2018).
- 522 28. C. A. Bücherl *et al.*, Plant immune and growth receptors share common signalling components  
523 but localise to distinct plasma membrane nanodomains. *Elife* **6**, e25114 (2017).
- 524 29. X. Wang *et al.*, Autoregulation and homodimerization are involved in the activation of the plant  
525 steroid receptor BRI1. *Dev. Cell* **8**, 855-865 (2005).
- 526 30. T. Liu *et al.*, Chitin-induced dimerization activates a plant immune receptor. *Science* **336**, 1160-  
527 1164 (2012).
- 528 31. N. F. Endres *et al.*, Conformational coupling across the plasma membrane in activation of the  
529 EGF receptor. *Cell* **152**, 543-556 (2013).
- 530 32. J. Schlessinger, Ligand-induced, receptor-mediated dimerization and activation of EGF receptor.  
531 *Cell* **110**, 669-672 (2002).
- 532 33. M. Z. Cabail *et al.*, The insulin and IGF1 receptor kinase domains are functional dimers in the  
533 activated state. *Nature communications* **6**, 6406 (2015).
- 534 34. P. K. Mattila, F. D. Batista, B. Treanor, Dynamics of the actin cytoskeleton mediates receptor  
535 cross talk: An emerging concept in tuning receptor signaling. *J Cell Biol* **212**, 267-280 (2016).
- 536 35. D. Chinchilla *et al.*, A flagellin-induced complex of the receptor FLS2 and BAK1 initiates plant  
537 defence. *Nature* **448**, 497-500 (2007).
- 538 36. M. Roux *et al.*, The *Arabidopsis* leucine-rich repeat receptor-like kinases BAK1/SERK3 and  
539 BKK1/SERK4 are required for innate immunity to hemibiotrophic and biotrophic pathogens. *The*  
540 *Plant Cell* **23**, 2440-2455 (2011).
- 541 37. W. Sun *et al.*, Probing the Arabidopsis flagellin receptor: FLS2-FLS2 association and the  
542 contributions of specific domains to signaling function. *The Plant Cell* **24**, 1096-1113 (2012).
- 543 38. S. Ghosh, S. Saha, D. Goswami, S. Bilgrami, S. Mayor, "Dynamic imaging of homo-FRET in live  
544 cells by fluorescence anisotropy microscopy" in *Methods in enzymology*. (Elsevier, 2012), vol.  
545 505, pp. 291-327.
- 546 39. J. M. Kalappurakkal *et al.*, Integrin mechano-chemical signaling generates plasma membrane  
547 nanodomains that promote cell spreading. *Cell* (2019).
- 548 40. S. Saha, R. Raghupathy, S. Mayor, Homo-FRET imaging highlights the nanoscale organization of  
549 cell surface molecules. *Methods Mol Biol* **1251**, 151-173 (2015).
- 550 41. Y. Cui *et al.*, Sterols regulate endocytic pathways during flg22-induced defense responses in  
551 *Arabidopsis*. *Development* **145**, dev165688 (2018).
- 552 42. J. Xu *et al.*, A molecular framework for plant regeneration. *Science* **311**, 385-388 (2006).
- 553 43. S. Robert *et al.*, ABP1 mediates auxin inhibition of clathrin-dependent endocytosis in Arabidopsis.  
554 *Cell* **143**, 111-121 (2010).
- 555 44. W. Dejonghe *et al.*, Mitochondrial uncouplers inhibit clathrin-mediated endocytosis largely through  
556 cytoplasmic acidification. *Nature communications* **7** (2016).

- 557 45. W. Dejonghe *et al.*, Disruption of endocytosis through chemical inhibition of clathrin heavy chain  
558 function. *Nat. Chem. Biol.* **15**, 641 (2019).
- 559 46. Y. Miao, P. K. Yan, H. Kim, I. Hwang, L. Jiang, Localization of green fluorescent protein fusions  
560 with the seven Arabidopsis vacuolar sorting receptors to prevacuolar compartments in tobacco  
561 BY-2 cells. *Plant Physiol.* **142**, 945-962 (2006).
- 562 47. N. Geldner *et al.*, Rapid, combinatorial analysis of membrane compartments in intact plants with a  
563 multicolor marker set. *The Plant Journal* **59**, 169-178 (2009).
- 564 48. A. Baral *et al.*, Salt-induced remodeling of spatially restricted clathrin-independent endocytic  
565 pathways in Arabidopsis root. *The Plant Cell* **27**, 1297-1315 (2015).
- 566 49. J. Wollam, A. Antebi, Sterol regulation of metabolism, homeostasis, and development. *Annu.*  
567 *Rev. Biochem.* **80**, 885-916 (2011).
- 568 50. M. Laloi *et al.*, Insights into the role of specific lipids in the formation and delivery of lipid  
569 microdomains to the plasma membrane of plant cells. *Plant Physiol.* **143**, 461-472 (2007).
- 570 51. C. A. López, A. H. de Vries, S. J. Marrink, Molecular mechanism of cyclodextrin mediated  
571 cholesterol extraction. *PLoS Comp. Biol.* **7**, e1002020 (2011).
- 572 52. S. Mahammad, I. Parmryd, "Cholesterol depletion using methyl- $\beta$ -cyclodextrin" in *Methods in*  
573 *Membrane Lipids*. (Springer, 2015), pp. 91-102.
- 574 53. D. Huang *et al.*, Salicylic acid-mediated plasmodesmal closure via Remorin-dependent lipid  
575 organization. *Proceedings of the National Academy of Sciences* **116**, 21274-21284 (2019).
- 576 54. J. Valitova *et al.*, Sterol binding by methyl- $\beta$ -cyclodextrin and nystatin—comparative analysis of  
577 biochemical and physiological consequences for plants. *The FEBS journal* **281**, 2051-2060  
578 (2014).
- 579 55. P. Gerbeau-Pissot *et al.*, Modification of plasma membrane organization in tobacco cells elicited  
580 by cryptogein. *Plant Physiol.* **164**, 273-286 (2014).
- 581 56. J. X. He *et al.*, Sterols regulate development and gene expression in Arabidopsis. *Plant*  
582 *physiology* **131**, 1258-1269 (2003).
- 583 57. I. K. Jarsch *et al.*, Plasma membranes are subcompartmentalized into a plethora of coexisting  
584 and diverse microdomains in Arabidopsis and *Nicotiana benthamiana*. *The Plant Cell* **26**, 1698-  
585 1711 (2014).
- 586 58. K. Grosjean, S. Mongrand, L. Beney, F. Simon-Plas, P. Gerbeau-Pissot, Differential effect of  
587 plant lipids on membrane organization specificities of phytosphingolipids and phytosterols. *J. Biol.*  
588 *Chem.* **290**, 5810-5825 (2015).
- 589 59. A. J. García-Sáez, S. Chiantia, P. Schwille, Effect of line tension on the lateral organization of  
590 lipid membranes. *J. Biol. Chem.* (2007).
- 591 60. S. Boulant, C. Kural, J.-C. Zeeh, F. Ubelmann, T. Kirchhausen, Actin dynamics counteract  
592 membrane tension during clathrin-mediated endocytosis. *Nat. Cell Biol.* **13**, 1124 (2011).
- 593 61. D. M. Brooks *et al.*, Identification and characterization of a well-defined series of coronatine  
594 biosynthetic mutants of *Pseudomonas syringae* pv. tomato DC3000. *Mol. Plant-Microbe Interact.*  
595 **17**, 162-174 (2004).
- 596 62. L. Toum *et al.*, Coronatine inhibits stomatal closure through guard cell-specific inhibition of  
597 NADPH oxidase-dependent ROS production. *Frontiers in plant science* **7**, 1851 (2016).
- 598 63. X. Geng, J. Cheng, A. Gangadharan, D. Mackey, The coronatine toxin of *Pseudomonas syringae*  
599 is a multifunctional suppressor of Arabidopsis defense. *The Plant Cell* **24**, 4763-4774 (2012).
- 600 64. D. Song *et al.*, *Pseudomonas aeruginosa* quorum-sensing metabolite induces host immune cell  
601 death through cell surface lipid domain dissolution. *Nature microbiology*, 1 (2018).
- 602 65. A. Keymer *et al.*, Lipid transfer from plants to arbuscular mycorrhiza fungi. *Elife* **6** (2017).
- 603 66. Q. Cai *et al.*, Plants send small RNAs in extracellular vesicles to fungal pathogen to silence  
604 virulence genes. *Science* **360**, 1126-1129 (2018).
- 605 67. Y.-W. He, J. e. Wu, J.-S. Cha, L.-H. Zhang, Rice bacterial blight pathogen *Xanthomonas oryzae*  
606 pv. *oryzae* produces multiple DSF-family signals in regulation of virulence factor production. *BMC*  
607 *microbiology* **10**, 187 (2010).



- 608 68. G. E. Gudesblat, P. S. Torres, A. A. Vojnov, *Xanthomonas campestris* overcomes *Arabidopsis*  
609 stomatal innate immunity through a DSF cell-to-cell signal-regulated virulence factor. *Plant*  
610 *Physiol.* **149**, 1017-1027 (2009).
- 611 69. D. Khokhani, T. M. Lowe-Power, T. M. Tran, C. Allen, A Single regulator mediates strategic  
612 switching between attachment/spread and growth/virulence in the plant pathogen *Ralstonia*  
613 *solanacearum*. *mBio* **8**, e00895-00817 (2017).
- 614 70. A. Hartmann, M. Rothballer, B. A. Hense, P. Schröder, Bacterial quorum sensing compounds are  
615 important modulators of microbe-plant interactions. *The Plant Microbiome and Its Importance for*  
616 *Plant and Human Health; Frontiers E-books: Lausanne, Switzerland*, 41 (2015).
- 617 71. A. Kutschera *et al.*, Bacterial medium-chain 3-hydroxy fatty acid metabolites trigger immunity in  
618 *Arabidopsis* plants. *Science* **364**, 178-181 (2019).
- 619 72. D. Song *et al.*, *Pseudomonas aeruginosa* quorum-sensing metabolite induces host immune cell  
620 death through cell surface lipid domain dissolution. *Nature microbiology* **4**, 97 (2019).
- 621 73. X. Luo *et al.*, Tyrosine phosphorylation of the lectin receptor-like kinase LORE regulates plant  
622 immunity. *The EMBO Journal* (2020).
- 623 74. A. Ferrer, T. Altabella, M. Arró, A. Boronat, Emerging roles for conjugated sterols in plants. *Prog.*  
624 *Lipid Res.* **67**, 27-37 (2017).
- 625 75. A. Potocka, J. Zimowski, Metabolism of conjugated sterols in eggplant. Part 2. Phospholipid:  
626 steryl glucoside acyltransferase. *Acta Biochimica Polonica -English Edition* **55**, 135 (2008).
- 627 76. T. Naito *et al.*, Movement of accessible plasma membrane cholesterol by the GRAMD1 lipid  
628 transfer protein complex. *eLife* **8** (2019).
- 629 77. A. T. Gatta *et al.*, A new family of StART domain proteins at membrane contact sites has a role in  
630 ER-PM sterol transport. *eLife* **4**, e07253 (2015).
- 631 78. L. V. Michaelson, J. A. Napier, D. Molino, J.-D. Faure, Plant sphingolipids: Their importance in  
632 cellular organization and adaptation. *Biochimica et Biophysica Acta (BBA)-Molecular and Cell*  
633 *Biology of Lipids* **1861**, 1329-1335 (2016).
- 634 79. P. Sperling, E. Heinz, Plant sphingolipids: structural diversity, biosynthesis, first genes and  
635 functions. *Biochimica et Biophysica Acta (BBA)-Molecular and Cell Biology of Lipids* **1632**, 1-15  
636 (2003).
- 637 80. F. Furt, F. Simon-Plas, S. Mongrand, "Lipids of the plant plasma membrane" in *The plant plasma*  
638 *membrane*. (Springer, 2011), pp. 3-30.
- 639 81. R. Raghupathy *et al.*, Transbilayer lipid interactions mediate nanoclustering of lipid-anchored  
640 proteins. *Cell* **161**, 581-594 (2015).
- 641 82. M. P. Platre *et al.*, Developmental control of plant Rho GTPase nano-organization by the lipid  
642 phosphatidylserine. *Science* **364**, 57-62 (2019).
- 643 83. J. D. Jones, J. L. Dangl, The plant immune system. *Nature* **444**, 323 (2006).
- 644 84. T. S. Charlton *et al.*, A novel and sensitive method for the quantification of N-3-oxoacyl  
645 homoserine lactones using gas chromatography–mass spectrometry: application to a model  
646 bacterial biofilm. *Environ. Microbiol.* **2**, 530-541 (2000).
- 647 85. A. Heese *et al.*, The receptor-like kinase SERK3/BAK1 is a central regulator of innate immunity in  
648 plants. *Proceedings of the National Academy of Sciences* **104**, 12217-12222 (2007).
- 649 86. K. Yamada *et al.*, The *Arabidopsis* CERK1-associated kinase PBL27 connects chitin perception  
650 to MAPK activation. *The EMBO journal* **35**, 2468-2483 (2016).
- 651 87. T. Shinya *et al.*, Selective regulation of the chitin-induced defense response by the *Arabidopsis*  
652 receptor-like cytoplasmic kinase PBL 27. *The Plant Journal* **79**, 56-66 (2014).
- 653 88. M. L. Dustin, J. T. Groves, Receptor signaling clusters in the immune synapse. *Annual review of*  
654 *biophysics* **41**, 543-556 (2012).
- 655 89. P. Liu *et al.*, Lipid microdomain polarization is required for NADPH oxidase-dependent ROS  
656 signaling in *Picea meyeri* pollen tube tip growth. *The Plant Journal* **60**, 303-313 (2009).
- 657 90. J. Zhang *et al.*, Receptor-like cytoplasmic kinases integrate signaling from multiple plant immune  
658 receptors and are targeted by a *Pseudomonas syringae* effector. *Cell host & microbe* **7**, 290-301  
659 (2010).

- 660 91. H. Shi *et al.*, BR-SIGNALING KINASE1 physically associates with FLAGELLIN SENSING2 and  
661 regulates plant innate immunity in Arabidopsis. *The Plant Cell* **25**, 1143-1157 (2013).
- 662 92. X. Liang *et al.*, Arabidopsis heterotrimeric G proteins regulate immunity by directly coupling to the  
663 FLS2 receptor. *Elife* **5**, e13568 (2016).
- 664 93. L. Xu, X. Yao, N. Zhang, B.-Q. Gong, J.-F. Li, Dynamic G protein alpha signaling in *Arabidopsis*  
665 innate immunity. *Biochem. Biophys. Res. Commun.* (2017).
- 666 94. H. Hao *et al.*, Clathrin and membrane microdomains cooperatively regulate RbohD dynamics and  
667 activity in Arabidopsis. *The Plant Cell* **26**, 1729-1745 (2014).
- 668 95. J. Xue, B. Q. Gong, X. Yao, X. Huang, J. F. Li, BAK1-mediated phosphorylation of canonical G  
669 protein alpha during flagellin signaling in *Arabidopsis*. *J. Integr. Plant Biol.* (2019).
- 670 96. L. Wang *et al.*, Spatiotemporal dynamics of the BRI1 receptor and its regulation by membrane  
671 microdomains in living Arabidopsis cells. *Molecular plant* **8**, 1334-1349 (2015).
- 672 97. R. J. Petrie, P. P. Schnetkamp, K. D. Patel, M. Awasthi-Kalia, J. P. Deans, Transient  
673 translocation of the B cell receptor and Src homology 2 domain-containing inositol phosphatase  
674 to lipid rafts: evidence toward a role in calcium regulation. *The Journal of Immunology* **165**, 1220-  
675 1227 (2000).
- 676 98. J. Gao *et al.*, Mechanistic insights into EGFR membrane clustering revealed by super-resolution  
677 imaging. *Nanoscale* **7**, 2511-2519 (2015).
- 678 99. B. Treanor, B-cell receptor: from resting state to activate. *Immunology* **136**, 21-27 (2012).
- 679 100. R. Raghupathy *et al.*, Transbilayer lipid interactions mediate nanoclustering of lipid-anchored  
680 proteins. *Cell* **161**, 581-594 (2015).
- 681 101. D. V. Köster, S. Mayor, Cortical actin and the plasma membrane: inextricably intertwined. *Curr.*  
682 *Opin. Cell Biol.* **38**, 81-89 (2016).
- 683 102. E. Sezgin, I. Levental, S. Mayor, C. Eggeling, The mystery of membrane organization:  
684 composition, regulation and roles of lipid rafts. *Nature reviews Molecular cell biology* **18**, 361  
685 (2017).
- 686 103. K. Simons, E. Ikonen, Functional rafts in cell membranes. *Nature* **387**, 569 (1997).
- 687 104. S. Men *et al.*, Sterol-dependent endocytosis mediates post-cytokinetic acquisition of PIN2 auxin  
688 efflux carrier polarity. *Nat. Cell Biol.* **10**, 237 (2008).
- 689 105. J. H. Kim, A. Singh, M. Del Poeta, D. A. Brown, E. London, The effect of sterol structure upon  
690 clathrin-mediated and clathrin-independent endocytosis. *J. Cell Sci.* **130**, 2682-2695 (2017).
- 691 106. S. Ben Khaled, J. Postma, S. Robatzek, A moving view: subcellular trafficking processes in  
692 pattern recognition receptor-triggered plant immunity. *Annu Rev Phytopathol* **53**, 379-402 (2015).
- 693 107. P. Zou, A. Y. Ting, Imaging LDL receptor oligomerization during endocytosis using a co-  
694 internalization assay. *ACS Chem. Biol.* **6**, 308-313 (2011).
- 695 108. L. Fan *et al.*, Dynamic analysis of Arabidopsis AP2  $\sigma$  subunit reveals a key role in clathrin-  
696 mediated endocytosis and plant development. *Development* **140**, 3826-3837 (2013).
- 697 109. N. Geldner, D. L. Hyman, X. Wang, K. Schumacher, J. Chory, Endosomal signaling of plant  
698 steroid receptor kinase BRI1. *Genes & development* **21**, 1598-1602 (2007).
- 699 110. J. Shen *et al.*, A plant Bro1 domain protein BRAF regulates multivesicular body biogenesis and  
700 membrane protein homeostasis. *Nature communications* **9**, 3784 (2018).
- 701 111. K. Schrick *et al.*, FACKEL is a sterol C-14 reductase required for organized cell division and  
702 expansion in Arabidopsis embryogenesis. *Genes & Development* **14**, 1471-1484 (2000).
- 703 112. A. C. Diener *et al.*, Sterol methyltransferase 1 controls the level of cholesterol in plants. *The Plant*  
704 *Cell* **12**, 853-870 (2000).
- 705 113. D. A. Cuppels, Generation and characterization of Tn5 insertion mutations in *Pseudomonas*  
706 *syringae* pv. *tomato*. *Appl. Environ. Microbiol.* **51**, 323-327 (1986).
- 707 114. T. Czechowski, M. Stitt, T. Altmann, M. K. Udvardi, W.-R. Scheible, Genome-wide identification  
708 and testing of superior reference genes for transcript normalization in *Arabidopsis*. *Plant Physiol.*  
709 **139**, 5-17 (2005).
- 710 115. M. E. Leslie, A. Heese, "Quantitative analysis of ligand-induced endocytosis of FLAGELLIN-  
711 SENSING 2 using automated image segmentation" in Plant Pattern Recognition Receptors.  
712 (Springer, 2017), pp. 39-54.

- 713 116. J. Schindelin *et al.*, Fiji: an open-source platform for biological-image analysis. *Nature methods* **9**,  
714 676 (2012).
- 715 117. J. Gronnier *et al.*, Structural basis for plant plasma membrane protein dynamics and organization  
716 into functional nanodomains. *Elife* **6** (2017).
- 717 118. H. S. Vu *et al.*, Lipid changes after leaf wounding in *Arabidopsis thaliana*: expanded lipidomic  
718 data form the basis for lipid co-occurrence analysis. *The Plant Journal* **80**, 728-743 (2014).
- 719 119. J. E. Markham, J. G. Jaworski, Rapid measurement of sphingolipids from *Arabidopsis thaliana* by  
720 reversed-phase high-performance liquid chromatography coupled to electrospray ionization  
721 tandem mass spectrometry. *Rapid Communications in Mass Spectrometry: An International*  
722 *Journal Devoted to the Rapid Dissemination of Up-to-the-Minute Research in Mass*  
723 *Spectrometry* **21**, 1304-1314 (2007).
- 724 120. Y. Ishiga, T. Ishiga, S. R. Uppalapati, K. S. Mysore, *Arabidopsis* seedling flood-inoculation  
725 technique: a rapid and reliable assay for studying plant-bacterial interactions. *Plant Methods* **7**, 32  
726 (2011).
- 727 121. Z. Cheng *et al.*, Pathogen-secreted proteases activate a novel plant immune pathway. *Nature*  
728 **521**, 213 (2015).
- 729
- 730
- 731

732 **FIGURE LEGENDS**

733

734 **Fig. 1. Diffusible-signal factor (DSF) simultaneously dampens several plant defense responses in**

735 ***Arabidopsis thaliana* against the bacterial PAMP flg22. (A)** Stomatal apertures of 5-week old Col-0

736 leaves after flg22 elicitation. Intact leaves were infiltrated with DMSO or 25  $\mu$ M DSF diluted in 10 mM MgCl<sub>2</sub>

737 for 24 h before the epidermal layers of detached leaves were peeled off and treated with 1  $\mu$ M flg22, stained

738 with propidium iodine and imaged. Stomatal apertures were measure by Fiji ( $n \geq 130$  stomata, bars, 10  $\mu$ m).

739 **(B)** Callose deposition in 2-week old Col-0 plants pre-treated with DMSO or 25  $\mu$ M DSF in 1/2 liquid MS for

740 24 h before being elicited by flg22 in liquid 1/2 MS. Leaves were stained with aniline blue and imaged using

741 a confocal microscope with UV excitation to visualize flg22-triggered callose deposition. Plants treated with

742 only DMSO or DSF were used as negative control ( $n \geq 40$  images; bar, 100  $\mu$ m) **(C)** Reactive oxygen burst

743 in Col-0 leave strips pre-treated with DMSO or 25  $\mu$ M DSF for 24 h prior to flg22 elicitation ( $n \geq 6$  leaf

744 discs/condition). The experiment were repeated three times. **(D)** Bacterial population at 4 days post-

745 inoculation (DPI) in *Arabidopsis* 2-week old seedlings pre-treated with DMSO (solvent control) or DSF,

746 followed by priming with flg22 peptide and flooding assay with *Pst* DC3000. Boxplot represent pooled data

747 from two independent experiments ( $n = 21$ ). **(E)** Protection index (%) was derived from log CFU/mg tissue

748 by dividing the differences between flg22-treated group and the control group to the mean bacterial

749 population of the control group. P-values were determined by one-way ANOVA (\*  $p < 0.05$ ; \*\*  $p < 0.01$ ; \*\*\*

750  $p < 0.001$ ; \*\*\*\*  $p < 0.0001$ ; ns, not significant).

751

752 **Fig 2. DSF delays ligand-induced endocytosis of the FLS2 receptor in response to flg22 peptide.**

753 **(A)** Five-day old FLS2-GFP seedlings were treated for 24 h in liquid 1/2 MS medium supplemented with

754 25  $\mu$ M DSF or DMSO (solvent control) before being elicited with 10  $\mu$ M flg22 and imaged at indicated

755 timepoints. Micrographs represent maximum projections of 12 slices every 1  $\mu$ m z-distance (bars, 20  $\mu$ m).

756 Bar graphs represent the numbers of endosomes per image. Error bars, SEM ( $n \geq 12$ ) **(B)** FLS2-GFP

757 receptors on the PM of *Arabidopsis* cotyledons. Five-day old FLS2-GFP plants were treated with DMSO

758 or DSF for 24 h prior to elicitation by 10  $\mu$ M flg22 and imaged using VA-TIRFM (bar, 1  $\mu$ m). **(C)**

759 Kymographs of FLS2-GFP clusters on *Arabidopsis* plasma membrane before and after 60 min of flg22

760 elicitation, following DMSO or 25  $\mu$ M DSF 24-h pre-treatment. The lifetime of FLS2-GFP foci was

761 measured from kymographs using Fiji ( $n \geq 100$  endocytic events). **(D)** Boxplot represents spatial clustering

762 of FLS2 receptor foci, indicated by Spatial Clustering Index (SCI). SCI was calculated from TIRF

763 timelapse movies based on the ratio of top 5% of pixels with the highest intensity and 5% of pixels with

764 the lowest intensity ( $n \geq 60$  ROIs). **(E)** Homo-FRET analysis of receptor oligomerization on PM of DMSO-

765 and DSF-treated FLS2-GFP seedlings upon flg22 elicitation for 5 min. As the plasma membrane is not

766 definite flat, anisotropy quantification was performed only in those well-focused regions of the plasma

767 membrane (white dashed lines) (bar, 5  $\mu$ m). Boxplot represents anisotropy values calculated from homo-

768 FRET imaging of FLS2-GFP. Representative intensity and anisotropy images were shown. Insets are

769 representative 20x20 pixel ROIs used for data analysis ( $n \geq 150$  ROIs). P-values were determined by one-  
770 way ANOVA (\*  $p < 0.05$ ; \*\*  $p < 0.01$ ; \*\*\*  $p < 0.001$ ; \*\*\*\*  $p < 0.0001$ ; ns, not significant).

771

772 **Fig. 3. DSF inhibited endocytosis in *Arabidopsis* roots by altering plant lipid profile. (A)**

773 Internalization of the endocytic tracer FM4-64 in PIN2-GFP seedling roots pre-treated with DMSO or DSF  
774 for 24 h. Plants were treated in liquid  $\frac{1}{2}$  MS with DMSO (control) or 50  $\mu$ M ES9-17 for 1 h before being  
775 stained with FM4-64 and visualised using confocal microscopy ( $n \geq 5$  plants; bars, 10  $\mu$ m). **(B)**

776 Accumulation of intracellular FM4-64 signals into BFA compartments after BFA treatment. PIN2-GFP  
777 seedlings pre-treated for 24 h on  $\frac{1}{2}$  MS agar supplemented with DMSO or DSF were subjected to BFA or  
778 ES9-17+BFA treatments before being stained with FM4-64 and imaged ( $n \geq 5$  plants; bars, 10  $\mu$ m). **(C)**

779 Boxplot represents the ratio of intracellular/plasma membrane signal intensity of FM4-64 dye in root cells  
780 presented in Fig. 3A as an indicator of bulk endocytosis ( $n \geq 37$  cells). **(D)** Boxplot represents the area of

781 BFA compartments in seedlings grown on DMSO- or DSF-supplemented plates as presented in Fig. **3B**,

782  $n \geq 161$  BFA compartments. **(E)** Growth of Col-0 seedlings on  $\frac{1}{2}$  MS agar supplemented with DMSO, 25

783  $\mu$ M DSF, 2mM M $\beta$ CD and 25  $\mu$ M DSF+2mM M $\beta$ CD. Images of whole seedlings and root hairs were taken

784 after seven days (top panel bars, 10 mm; bottom panel bar, 1mm). The length of primary roots ( $n \geq 20$ ) and

785 root hairs ( $n \geq 140$ ) of 7-day old seedlings on different medium measured by Fiji. **(F)** Lipidomic profiles of

786 *Arabidopsis* Col-0 seedlings after seven days growing on  $\frac{1}{2}$  MS agar supplemented with either 25  $\mu$ M

787 DSF, 2 mM M $\beta$ CD or 25  $\mu$ M DSF + 2 mM M $\beta$ CD. Heatmap representing the log<sub>2</sub> value of fold change

788 compared to DMSO treatment ( $n = 6$  replicates). The bar graph parallel to the heatmap indicates the

789 relative abundance (in percentages) of the corresponding species within each lipid class. **(G)** DSF-

790 induced Inhibition rate of sterol mutants *fk-X224* and *smt1-1* and their corresponding wildtype ecotypes

791 Ler and Ws. Seedlings were monitored for seven days on DMSO- and 25  $\mu$ M DSF- supplemented  $\frac{1}{2}$  MS

792 plates ( $n \geq 28$  plants). Inhibition rate (%) was represented by the ratio between the difference in primary

793 root length of seedlings on control (DMSO) vs. DSF-supplemented medium and the mean primary root

794 length of control seedlings. P-values were determined by one-way ANOVA (\*  $p < 0.05$ ; \*\*  $p < 0.01$ ; \*\*\*  $p <$

795 0.001; \*\*\*\*  $p < 0.0001$ ; ns, not significant).

796

797 **Fig. 4. Sterol depletion by M $\beta$ CD recovered DSF/sterol-induced phenotypes on *Arabidopsis***  
798 **seedlings.**

799 **(A)** FLS2 receptor internalization into endosomes monitored by confocal microscopy following 10  $\mu$ M

800 flg22 treatment. FLS2-GFP seedlings were pre-treated for 24 h with DMSO or 25  $\mu$ M DSF in  $\frac{1}{2}$  MS,

801 followed by a brief 2 mM M $\beta$ CD treatment for 30 min prior to peptide elicitation. Micrographs represent

802 maximum projections from 12 slices taken every 1  $\mu$ m z-distance. Bar graphs showed the number of

803 endosomes per image ( $n \geq 10$  images; bar, 20  $\mu$ m). **(B)** Internalization of FM4-64 dye of PIN2-GFP

804 seedling roots after plants were treated for 24 h on  $\frac{1}{2}$  MS plates with 25  $\mu$ M DSF followed by 30 min

805 treatment with 2 mM M $\beta$ CD in liquid  $\frac{1}{2}$  MS. Plants were treated with 50  $\mu$ M ES9-17 for 1 h and/or 50  $\mu$ M  
806 BFA-1h before staining with FM4-64, and DMSO was used as solvent control ( $n \geq 5$  plants; bar, 10  $\mu$ m).  
807 Quantification of intracellular/PM ratio were performed on  $n \geq 50$  cells and BFA bodies area measurement  
808 were performed on  $n \geq 250$  BFA bodies. **(C)** ROS production by Col-0 leaf strips treated for 24 h with  
809 DMSO or 25  $\mu$ M DSF, followed by a 30-min treatment with water (control) or 2 mM M $\beta$ CD prior to  
810 elicitation by 1  $\mu$ M flg22 peptide. The experiment were repeated twice with similar result. P-values were  
811 determined by 2-tailed Student's *t*-test (\*  $p < 0.05$ ; \*\*  $p < 0.01$ ; \*\*\*  $p < 0.001$ ; \*\*\*\*  $p < 0.0001$ ; ns, not  
812 significant).

813

814 **Fig. 5. Lipid microdomain integrity is dependent on proper sterol composition of the PM. (A)** 2D-  
815 SIM images of the microdomain marker REM1.2-GFP taken after 24 h treatment with DMSO, DSF, or  
816 sterol mix followed by a 30 min treatment with 2 mM M $\beta$ CD or water control (bar, 2  $\mu$ m). **(B)**  
817 Quantification of Remorin foci intensity on PM ( $n=500$  foci). **(C)** Oligomerisation state of FLS2-GFP  
818 receptors before and after 5 min of elicitation with 10  $\mu$ M flg22 following treatment of the seedlings M $\beta$ CD  
819 or DSF+ M $\beta$ CD. Representative intensity and anisotropy images were shown. Insets are representative  
820 20x20-pixel ROIs used for data analysis (bar, 5  $\mu$ m). **(D)** Boxplot represents anisotropy values measured  
821 from Homo-FRET experiment ( $n \geq 150$  ROIs). P-values were determined by one-way ANOVA (\*  $p < 0.05$ ; \*\*  
822  $p < 0.01$ ; \*\*\*  $p < 0.001$ ; \*\*\*\*  $p < 0.0001$ ; ns, not significant).

823

824 **Fig. 6. Proposed model for DSF-induced suppression of plant innate immunity by perturbation of**  
825 **PM lipids.** Upon contact with bacteria/flagellin, FLS2 receptors form homodimers and heterodimers with  
826 interacting partners on the plasma membrane. Activated receptors then relay the signals to PM co-  
827 receptors and cytoplasmic kinases to induce a wide range of defense responses and also undergo  
828 endocytosis. However, in plants infected with DSF-producing bacteria, DSF could be metabolized into  
829 plant sterols or directly induce the production of phytosterols via unknown mechanisms. Sterol enrichment  
830 on the plant PM leads to an increase in lipid ordered phase - L<sub>o</sub> (or PM microdomains) and a decrease in  
831 lipid disordered phase (L<sub>d</sub> phase). Receptor nanoclustering were affected and as a result, they could not  
832 oligomerize and undergo endocytosis properly. Therefore, signalling cascades from plasma membrane  
833 that result in PTI responses were attenuated.

834

835 **Fig. S1. DSF affected plant growth and flagellin receptor degradation (A)** Growth of *Arabidopsis* Col-  
836 0 seedlings seven days on 1/2 Murashige-Skoog agar supplemented with different concentrations of DSF  
837 (bar, 10 mm,  $n \geq 14$ ). **(B)** Confocal micrographs of the FLS2 receptor signal on PM of FLS2-GFP seedlings  
838 after treatment with 10  $\mu\text{M}$  flgII-28 (bar, 10  $\mu\text{m}$ ). Micrographs are maximum projections of 12 slices at  
839 every 1  $\mu\text{m}$  z-distance. Bargraph on the right represent number of endosomes per image quantified from  
840 maximum-projected images (Error bars, SEM,  $n \geq 12$ ). **(C)** Degradation of FLS2 receptor was delayed in  
841 DSF-treated plants. Leaf strips of 5-week old FLS2-GFP plants were floated for 24 h in water containing  
842 DMSO or 25  $\mu\text{M}$  DSF, then elicited with 10  $\mu\text{M}$  flg22 and snap-frozen in liquid nitrogen at indicated  
843 timepoints. Total protein extracts were probed with  $\alpha$ -GFP antibody to detect FLS2. Staining of the  
844 membrane with Ponceau S served as loading control. The experiment was repeated three times with  
845 similar results **(D)** Western blot analysis of MAPK responses of Col-0 leaf strips in response to the flg22  
846 peptide at different time-points, following 24 h treatment in 1/2 MS supplemented with DMSO or 25  $\mu\text{M}$   
847 DSF. Ponceau S staining of the WB membrane was shown as loading control. The experiment was  
848 repeated twice with similar result. **(E)** Relative transcript abundance of *FRK1* as measured by quantitative  
849 RT-PCR of *FRK1* expression. Data represent relative expression to control calculated using the  $\Delta\Delta\text{Ct}$   
850 method. Columns represent mean relative gene expression level of at least six technical replicates from  
851 two biological replicates (Error bars, SEM). **(F)** Co-immunoprecipitation assay on *Arabidopsis* protoplast  
852 co-transfected with FLS2-HA and BAK1-FLAG constructs. Transfected protoplasts were treated with 1  $\mu\text{M}$   
853 DSF for 12 h and elicited with 1  $\mu\text{M}$  flg22 for 10 min and CoIP was performed with anti-FLAG antibody.  
854 The experiment was repeated twice with similar result. P-values were determined by one-way ANOVA (\*  
855  $p < 0.05$ ; \*\*  $p < 0.01$ ; \*\*\*  $p < 0.001$ ; \*\*\*\*  $p < 0.0001$ ; ns, not significant).

856 **Fig. S2. Receptor endocytosis and clustering is affected by DSF**

857 **(A-C)** Kymographs and lifetime of clathrin light chain (CLC-GFP,  $n \geq 250$  events), brassinosteroid receptor  
858 BRI1 (BRI1-GFP,  $n \geq 136$  events) and Boron receptor BOR1 (BOR1-GFP,  $n \geq 198$  events). Kymographs  
859 were derived from VA-TIRF images obtained from corresponding marker lines grown on 1/2 MS plates for  
860 5-6 days, then treated with DMSO (control) or 25  $\mu\text{M}$  DSF for 24 h in 1/2 MS. **(D)** Anisotropy measured for  
861 purified GFP protein solution at definitive TIRF (incident angle was set as 1880), and two HILO angles  
862 (1910 and 2000). Quantification data shows similar anisotropy values can be obtained in these three  
863 different incident angles (bar, 2  $\mu\text{m}$ ,  $n \geq 42$  ROIs). **(E)** Anisotropy measured at HILO-TIRF gave the same  
864 result as definitive TIRF, in which samples could be illuminated evenly. Anisotropy of control and M $\beta$ CD  
865 (10 mM in Glucose M1 buffer for 45 min at 37°C) treated cells were measured at definitive TIRF (1880)  
866 and HILO-TIRF (1950 and 2000) using stably transfected GFP-GPI construct in CHO cells.  
867 Measurements show the same results at definitive TIRF (1880) and HILO-TIRF (1950); and at HILO-TIRF  
868 (2000) similar values can be obtained if measurements were considered from evenly illuminated area,

869 which is highlighted by dotted line (bar, 5  $\mu$ m,  $n \geq 30$  ROIs). P-values were determined by one-way ANOVA  
870 (\*  $p < 0.05$ ; \*\*  $p < 0.01$ ; \*\*\*  $p < 0.001$ ; \*\*\*\*  $p < 0.0001$ ; ns, not significant).

871 **Fig. S3. DSF did not cause morphological changes in *Arabidopsis* endosomal compartments. (A-**  
872 **C)** Confocal micrographs of DMSO/DSF-pretreated *Arabidopsis* early endosome marker line (VHAa1-  
873 GFP), late endosome marker line (RabF2b-YFP), and Golgi marker line (Got1p-YFP) stained with FM4-64  
874 dye with or without BFA treatment (bar, 10  $\mu$ m). The relative size of enlarged multivesicular bodies (MVB)  
875 and BFA compartments were measured by Fiji. **(D)** Ultrastructural observation of *Arabidopsis* organelles  
876 in eight-day-old seedlings pre-treated with DMSO/DSF observed by Transmission Electron Microscopy  
877 (upper panel scale bar, 200 nm; lower panel scale bar, 500 nm). Annotations on the electron-micrographs  
878 are as followed: G, Golgi; TGN, trans-Golgi network; CW, cell wall; m, mitochondria; MVB, multi-vesicular  
879 body; C, Chloroplast. **(E)** Sterol biosynthetic pathways in *Arabidopsis thaliana*. Corresponding mutants  
880 were labelled in each step of the pathways, with dashed arrows indicating multiple biosynthetic steps. **(F)**  
881 Growth of sterol biosynthesis mutants *fk-X224* and *smt1-1* and their corresponding wildtype ecotypes (Ler  
882 and Ws, respectively) on  $\frac{1}{2}$  MS agar supplemented with DMSO or 25  $\mu$ M DSF. Plates were scanned after  
883 seven days after sowing the seeds (bar, 5mm). The experiment was repeated twice with similar result. P-  
884 values were determined by 2-tailed Student's *t*-test (\*  $p < 0.05$ ; \*\*  $p < 0.01$ ; \*\*\*  $p < 0.001$ ; \*\*\*\*  $p < 0.0001$ ;  
885 ns, not significant).

886  
887 **Fig. S4. Sterol removal by M $\beta$ CD restored phytosterol-induced inhibition of endocytosis. (A)** FM4-  
888 64 dye uptake by PIN2-GFP roots treated with M $\beta$ CD in combination with ES9-17/BFA ( $n \geq 5$ ; bars, 10  $\mu$ m)  
889 **(B)** Life time of CLC-GFP in the presence of DSF, M $\beta$ CD and a combination of both drugs. CLC-GFP  
890 seedlings were treated with DMSO/25  $\mu$ M DSF for 24 h in  $\frac{1}{2}$  MS medium, then subjected to a brief  
891 treatment of 2 mM M $\beta$ CD before being imaged using VA-TIRF. **(C-D)** Sterol mix similarly inhibits FM4-64  
892 uptake in combination with the clathrin inhibitor ES9-17. Five-day old PIN2-GFP seedlings were  
893 transferred to  $\frac{1}{2}$  MS plates containing 50  $\mu$ M sterol mix **(C)** or 50  $\mu$ M sterol mix + 10 mM M $\beta$ CD **(D)** for an  
894 additional day. Plants were subjected to drug treatments (50  $\mu$ M ES9-17–1h, 50  $\mu$ M BFA – 1h, or a  
895 combination of both drugs) before being stained with FM4-64 and imaged ( $n \geq 5$ , bars, 10  $\mu$ m). P-values  
896 were determined by one-way ANOVA (\*  $p < 0.05$ ; \*\*  $p < 0.01$ ; \*\*\*  $p < 0.001$ ; \*\*\*\*  $p < 0.0001$ ; ns, not  
897 significant).

898

899 **Fig. S5. Phytosterols mimic DSF-induced inhibition of receptor internalization, ROS production**  
900 **and primary root growth**

901 **(A)** Internalization of the FLS2 receptor was monitored in FLS2-GFP seedling cotyledons. Plants were  
902 pre-treated with 50  $\mu$ M sterol mix or sterol mix + 2 mM M $\beta$ CD for 24 h prior to elicitation with 10  $\mu$ M of  
903 flg22 and imaged at indicated timepoints. ( $n \geq 12$ , bars, 10  $\mu$ m). Boxplots represent the number of  
904 endosomes per image as quantified by segmentation and particle analysis using Fiji. **(B)** ROS burst in



905 response to flg22 in Col-0 leaf strips pre-treated for 24 h with solvent control or 50  $\mu$ M sterol mix, with or  
906 without 2 mM M $\beta$ CD. **(C)** ROS production by Col-0 leaf strips pre-treated with DMSO/25  $\mu$ M DSF for 24 h  
907 simultaneously with the sterol biosynthesis inhibitor Lovastatin (Lova, 1  $\mu$ M). Leaf strips were then elicited  
908 with 1  $\mu$ M flg22 and luminescence was monitored every minute for 1 h by a BioTek Cytation 5 plate-  
909 reader. The experiment were repeated twice with similar result. **(D)** Root growth of Col-0 plants on  $\frac{1}{2}$  MS  
910 plates supplemented with different concentrations of  $\beta$ -Sitosterol seven days after sowing ( $n \geq 22$ ). **(E)**  
911 Dose-dependent reversion of  $\beta$ -Sitosterol-induced growth inhibition of *Arabidopsis* Col-0 by M $\beta$ CD. Col-0  
912 seeds were germinated on  $\frac{1}{2}$  MS agar supplemented with  $\beta$ -Sitosterol in combination with 2 mM or 10  
913 mM of M $\beta$ CD. After seven days, the plates were scanned and primary root lengths were measured using  
914 Fiji. Boxplot represents data from  $n \geq 20$  seedlings. P-values were determined by one-way ANOVA (\*  $p <$   
915 0.05; \*\*  $p < 0.01$ ; \*\*\*  $p < 0.001$ ; \*\*\*\*  $p < 0.0001$ ; ns, not significant).

916  
917 **Fig. S6. Osmotic stress relieved DSF-induced inhibition of endocytosis in *Arabidopsis*.** **(A)** Growth  
918 of Col-0 seedlings on  $\frac{1}{2}$  MS agar supplemented with DMSO or 25  $\mu$ M DSF in combination with  
919 increasing concentrations of NaCl or Mannitol. Seedlings primary root length was measured after 7 days  
920 growing on agar plates ( $n \geq 23$  seedlings). **(B)** Recovery of FLS2 internalization into endosomes by NaCl.  
921 Six-day old FLS2-GFP seedlings were transferred to liquid  $\frac{1}{2}$  MS supplemented with DMSO or 25  $\mu$ M  
922 DSF for 24 h, then treated with 100 mM NaCl for 1h prior to flg22 elicitation and imaged at the indicated  
923 time points. Micrographs represent maximum projection of 12 slices taken every 1  $\mu$ m (bar, 10  $\mu$ m,  $n \geq 12$   
924 images). P-values were determined by one-way ANOVA (\*  $p < 0.05$ ; \*\*  $p < 0.01$ ; \*\*\*  $p < 0.001$ ; \*\*\*\*  $p <$   
925 0.0001; ns, not significant).

926

927

928 **Dataset S1.** Lipidomic profile of *Arabidopsis* Col-0 seedlings grown on  $\frac{1}{2}$  MS agar plates supplemented  
929 with DMSO, DSF, M $\beta$ CD and DSF+ M $\beta$ CD. Plants were grown vertically on  $\frac{1}{2}$  MS agar amended with  
930 appropriate chemicals in each treatment for seven days before tissues were collected for lipid extraction  
931 and analysis.

932

933 **Dataset S2.** Relative fold-change of lipidomic profile of *Arabidopsis* Col-0 seedlings grown on DSF,  
934 M $\beta$ CD and DSF+ M $\beta$ CD compared to DMSO control. P-values were determined by one-sample *t*-test to  
935 determine if sample means are different than 1 at the confidence interval of 90%.

936

937 **Table S1.** Key resource table

938

939

940

941

942

## 943 **CONTACT FOR REAGENT AND RESOURCE SHARING**

944 Material used in this study can be found in the Key Resource Table (Table S1). Further information and  
945 requests for reagents and resources should be directed to and will be fulfilled by the Lead Contact,  
946 Yansong Miao (yansongm@ntu.edu.sg)

947

## 948 **EXPERIMENTAL MODEL AND SUBJECT DETAILS**

### 949 **Plant growth**

950 *Arabidopsis* [*Arabidopsis thaliana* (L.) Heynh.] plants were maintained in growth chamber at 22°C under  
951 long-day condition (16 h light/8 h dark). For *Arabidopsis* plants used in ROS assay and Western blot,  
952 plants were kept at short-day condition (8 h light/16 h dark) to facilitate vegetative growth. Col-0, RabF2b-  
953 YFP (Wave2Y), Got1p homolog-YFP (Wave 22Y) seeds were obtained from the Arabidopsis Resource  
954 Center (ABRC) stock centre (Ohio, U.S.A.). *Arabidopsis* FLS2-GFP, pREM1.2::YFP:REM1.2, CLC-GFP,  
955 BRI1-GFP and BOR1-GFP marker lines were described previously (18, 57; 108, 109,110).  
956 Sterol mutants *fkX224*, *smt1-1* and their WT ecotypes were described previously (111, 112). For cell  
957 biology imaging, *Arabidopsis* seeds were surface sterilised with 10% bleach and 70% EtOH, washed  
958 three times with sterilised water and vernalized at 4°C for 2 days. Seedlings were then sown on ½ MS  
959 agar and grown at 22°C for 4-5 days under long-day condition (16 h light/8 h dark) before treatments and  
960 imaging. For growth assay to evaluate primary root growth, we germinated surface-sterilised seeds  
961 directly on ½ MS agar containing indicated drugs. Plants were grown vertically at 22°C for seven days  
962 before images of the plates were taken using a flatbed scanner and primary root length was determined  
963 by Fiji software. Unless specified, all growth assays were repeated at least twice with approximately 20-  
964 30 seedlings for each treatment. For growth assay of sterol biosynthesis mutants on DMSO- and DSF-  
965 supplemented medium, growth inhibition rate (%) were defined as the percent difference between the root  
966 length of DSF-treated plants and the Mean root length of DMSO-treated plants.

### 967 **Bacterial strains**

968 *Pseudomonas syringae* pv. *tomato* DC3000 (*Pst*) (113) were cultured at 28 °C on NYG medium.

969

## 970 **METHODS**

971

### 972 **Chemicals and treatment conditions**

973 DSF (*cis*-11-methyl-2-dodecenonic) was purchased from Merck and dissolved in DMSO to obtain 100 mM  
974 stock. The bacterial flagellin peptides flg22 and flgII-28 were chemically synthesised (GL Biochem Ltd.,  
975 China) with 95% purity and dissolved in water to obtain 5 mM stocks. For pharmacological studies,  
976 Brefeldin A (BFA), Wortmannin, Lovastatin, and ES9-17 were dissolved in DMSO as 50 mM stocks.  
977 Unless specified, seedlings were incubated with these drugs at the working concentration of 50 µM in ½  
978 MS medium for 1 h at room temperature. The sterol-depleting reagent M/βCD was dissolved in deionised

979 water at 200 mM and filter-sterilized. For short-term M $\beta$ CD treatment, *Arabidopsis* seedlings were treated  
980 with 2 mM M $\beta$ CD in liquid ½ MS for 30 min at room temperature. Long-term growth assay with M $\beta$ CD was  
981 performed by germinating axenic *Arabidopsis* seeds directly on ½ MS agar containing 2mM M $\beta$ CD.

982

### 983 **qRT-PCR**

984 *Arabidopsis* Col-0 seeds were surface-sterilized and vernalized as mentioned above. Five-day old  
985 seedlings were transferred to new ½ MS plates containing either DMSO or 25  $\mu$ M DSF for three  
986 additional days. At day 8, the seedlings were subjected to a brief treatment with either 150 nM of flg22 or  
987 water control and plant tissue was frozen in liquid nitrogen and kept at -80°C. RNA extraction was  
988 performed using RNeasy Plant Minikit (Qiagen) according to manufacturer's instruction. Each treatment  
989 includes 2-3 biological replicates.

990 DNase treatment was performed twice using Turbo DNase (Ambion) and RNAClean XP kit  
991 (Agencourt). The quality of RNA samples was evaluated using the Qubit Fluorometer (Thermo Fisher).  
992 cDNA was synthesized by SuperScript III First-Strand Synthesis system (Invitrogen), using oligo-d(T)  
993 primer. Quantitative RT-PCR was performed in triplicate for each of the biological replicates, using Kapa  
994 SYBR FAST qPCR Master mix with primers specific for *FRK1* (13), and *EF-1 $\alpha$*  gene used as an internal  
995 control (114). Data were collected by Applied Biosystem StepOnePlus RealTime PCR system (Applied  
996 Biosystem) and analyzed using the manufacturer's software.

997

### 998 **Microscopy and data analysis**

#### 999 *Confocal microscopy*

1000 Confocal microscopy was performed on a Zeiss ELYRA PS.1 + LSM780 system equipped with a  
1001 63X Plan-Apochromat oil-objective (NA=1.4). GFP/YFP and FM4-64 were excited with a 488-nm and  
1002 514-nm laser, respectively. Emission was collected at 493-594 nm for GFP/YFP and 612-758 nm for  
1003 FM4-64, respectively. In addition, chloroplasts autofluorescence in FLS2-GFP cotyledons was also  
1004 captured from 630-730 nm.

1005 For imaging of FLS2-containing endosomes, image acquisition was performed as described  
1006 previously (115). Drug treatments of FLS2-GFP seedlings were performed in liquid ½ MS as followed:  
1007 DSF: 25  $\mu$ M- 24 h; Sterol mix (Sitosterol:Stigmasterol:Campesterol = 8:1:1): 50  $\mu$ M- 24 h; M $\beta$ CD: 2 mM -  
1008 30 min (alone or in combination with 25  $\mu$ M DSF- 24 h); 10 mM – 24 h (alone or in combination with 50  
1009  $\mu$ M sterol mix, 24 h). After drug treatments, FLS2-GFP seedlings were further elicited with 10  $\mu$ M flg22  
1010 and imaged at 30', 60' 120' post-elicitation (water was used as mock control). We also included at  
1011 treatment of 10  $\mu$ M flgII-28 as negative control since flgII-28 peptide is not recognized by *Arabidopsis*  
1012 FLS2 receptor. At indicated timepoints, z-stack images of FLS2-GFP seedling cotyledons were taken at  
1013 12 slices of 1  $\mu$ m z-distance. Endosome signals from maximum projection images were segmented to  
1014 remove plasma membrane signal using Fiji "Trainable Weka Segmentation" plug-in. Segmented images

1015 were analyzed further by “Particle Analysis” tool in Fiji (116) to obtain the number of endosomes per  
1016 image. Experiments were repeated twice, with 12 images taken from three seedlings for each replicate.

1017 To monitor FM4-64 uptakes in PIN2-GFP roots, seeds were sown on ½ MS agar and grown  
1018 vertically. Five-day old PIN2-GFP seedlings were then transferred to a new plate containing either DMSO  
1019 (control), 25 µM DSF or 50 µM sterol mix (Sitosterol:Stigmasterol:Campesterol = 8:1:1) for an additional  
1020 day. After 24 h of growth on DMSO/DSF/Sterol-supplemented media, the following drug treatments were  
1021 performed in liquid ½ MS at room temperature: M $\beta$ CD: 2 mM - 30 min (alone or in combination with 25  
1022 µM DSF- 24 h treatment); M $\beta$ CD: 10 mM – 24 h (alone or in combination with 50 µM sterol mix-24 h  
1023 treatment); NaCl: 100 mM - 1h; Mannitol 100mM - 1h; ES9-17: 50 µM-1h; BFA: 50 µM-1h. After  
1024 treatments, PIN2-GFP seedlings were incubated with 2 µM FM4-64 for 5 min at room temperature,  
1025 washed twice with fresh ½ MS medium and roots were imaged immediately using an ELYRA PS.1 +  
1026 LSM780 system equipped with a 63X Plan-Apochromat oil-objective (NA=1.4).

#### 1027 *VA-TIRFM and lifetime analysis*

1028 Variable-angled Total Internal Reflection Fluorescence Microscopy was performed on a Zeiss  
1029 ELYRA PS.1 + LSM780 system equipped with a 100X Plan-Apochromat oil-objective (NA=1.46) to  
1030 monitor the dynamics of PM markers. Time-lapse images of FLS2-GFP foci on plasma membrane was  
1031 taken at up to 120 frames with 1000-ms exposure at 2% laser power. Time-lapse movies of other PM  
1032 marker lines were acquired as followed: CLC-GFP: 90 cycles, 1000-ms exposure, 1000-ms interval,  
1033 BRI1-GFP and BOR1-GFP: 90 cycles, 500-ms exposure, 500-ms interval. Acquired VA-TIRFM images  
1034 were deconvolved using Huygens Essential (Scientific Volume Imaging) using theoretical PSFs. Particle  
1035 lifetime was measured from kymographs in Fiji. Lifetime of at least 100 individual foci from three different  
1036 seedlings were presented. The clustering of FLS2-GFP foci on plant plasma membrane, indicated by  
1037 spatial clustering index (SCI) was measured as described previously (117). Briefly, SCI was calculated  
1038 based on the ratio of top 5% pixels with the highest intensity and 5% of pixels with the lowest intensity  
1039 along 10-µm line ROIs selected from the first frame of each VA-TIRFM images. Data presented in  
1040 boxplots were from at least 60 individual ROIs.

1041

#### 1042 *2D-Structure Illumination Microscopy*

1043 2D-SIM (Structured Illumination Microscopy) image for pREM1.2::YFP:REM1.2 signals was conducted  
1044 using a Zeiss ELYRA PS.1 + LSM780 system with a Zeiss Alpha Plan Apochromat 100X (NA=1.46) oil  
1045 objective. A 488 nm laser light source was used to excite the YFP signal and the emission was collected  
1046 in the range of 495-575 nm by a sCMOS camera (PCO) with a pixel size as 6.5 µm x 6.5 µm, the  
1047 exposure time was set as 300 ms. All the 2D-SIM images contained five rotations and five phases of the  
1048 grated pattern (42 µm) for each image layer. SIM image reconstruction was conducted by setting the  
1049 Super-Resolution (SR) frequency weighting as 0.5 and the noise filter as -4.

1050 Particle tracking was performed in Imaris (Bitplane). Imaris Spots function was used to automatically  
1051 quantify the REM1.2 particle signals. To trace all the spots, the estimated spot diameter was set to 0.22

1052  $\mu\text{m}$  according to the preliminary particle analysis before processing the whole image, the threshold was  
1053 set to automatic region threshold. After tracing all the particles in each image, the total intensity of each  
1054 particle were analyzed and output automatically. For each treatment, data of 500 particles were randomly  
1055 selected from more than 10 images (more than 2000 particles in total for each treatment) for further  
1056 statistical analysis.

1057

#### 1058 *FLS2-GFP steady-state anisotropy measurement*

1059 Steady state anisotropy were measured on FLS2-GFP expressed live cells in cytoledon using  
1060 NikonTE2000 TIRF microscope with dual camera as described previously (38). Briefly, with respect to  
1061 plane of polarization of 488 nm excitation light ( $\sim 5.2$  mW power), emission intensity was collected by two  
1062 Evolve™ 512 EMCCD camera at parallel ( $I_{pa}$ ) and perpendicular ( $I_{pe}$ ) direction. Plasma membrane of the  
1063 plant was illuminated at HILO using variable TIRF angle module until the best SNR was achieved using a  
1064 100X (NA=1.45) objective with image plane pixel size of 106 nm and 1 s exposure time. Anisotropy  
1065 measured at HILO (1910, 1950 angles) showed same results as definitive TIRF, using GFP solution and  
1066 stable transfected GFP-GPI construct in CHO cells (Fig. S2D-E). Anisotropy values measure at HILO  
1067 (2000 angle) even showed similar results if ROI were taken from evenly illuminated area of the cells.  
1068 However, we have restricted our all measurements at HILO angle  $<1950$  to nullify any bias due to uneven  
1069 illumination. G-Factor of the instrument was calculated with freely diffused FITC solution by calculating  
1070 ratio of  $I_{pa}$  vs  $I_{pe}$  emission intensities (Ghosh et al., 2012). Then anisotropy of the FLS2-GFP was  
1071 calculated by G-factor corrected perpendicular images using the following equation:

1072

1073

$$r \text{ (anisotropy)} = \frac{I_{pa} - I_{pe}}{I_{pa} + 2I_{pe}}$$

1074 Alignment of images of  $I_{pa}$  and  $I_{pe}$  and G-factor corrections were done using algorithm written in Matlab  
1075 (MathWorks). FLS2-GFP anisotropy in different treatment conditions was compared using data from more  
1076 than 150 ROIs (20x20 pixel) from at least eight images taken from at least three seedlings. The  
1077 experiment involved two biological replicates.

1078

#### 1079 **Transmission electron microscopy**

1080 *Arabidopsis* Col-0 seeds were surface-sterilized and vernalized at 4°C for two days, then grown  
1081 on  $\frac{1}{2}$  MS plates at 22°C (16 h light/8 h dark). After five days, the seedlings were transferred to a new  $\frac{1}{2}$   
1082 MS plates containing either 25  $\mu\text{M}$  DSF or DMSO (solvent control) for an additional three days.  
1083 Eight-day-old seedlings were severed into root, hypocotyl and cotyledon sections. Plant tissues were  
1084 fixed in primary fixative (1 ml of 2.5% Glutaraldehyde prepared in 25 mM Sodium Cacodylate buffer pH  
1085 7.2) overnight at 4°C. Plant tissues were then washed four times in 25 mM sodium cacodylate buffer, 10  
1086 min each time. Then, plant tissues were submerged in 1 ml of secondary fixative (2% Osmium tetroxide,  
1087 0.5% Potassium ferricyanide in water) for 2 h at room temperature.

1088 The samples were washed four times with 1 ml of deionized water, each time for 10 min, then  
1089 transferred to 2% uranyl acetate solution and incubated at room temperature for 4 h. Plant samples were  
1090 washed four times with deionized water, each time for 10 min until the solution became clear. Sample  
1091 dehydration was done at room temperature with a series of increasing acetone solution as followed: 30%  
1092 - 20 min; 50% - 20 min; 75% - 20 min; 100% - 20 min (2X).

1093 Tissue embedding was performed using Spurr Low-viscosity Embedding Kit (Sigma-Aldrich).  
1094 Samples were incubated in increasing Spurr solutions, each time for 1 h as followed: 25%, 50%, 75% and  
1095 100%. After incubating with 100% Spurr, the samples were kept in fresh 100% Spurr solution overnight at  
1096 4°C. The next day, fresh 100% Spurr was added to the plant samples one more time. Plant tissues were  
1097 then transferred into BEEM embedding capsules (Electron Microscopy Sciences) with the position of the  
1098 samples at the bottom of the capsules, then incubated for 4 h at RT, followed by another 2 days at 60°C.  
1099 Sectioning was performed using a Cryo Leica EM UC7 diatome (Leica, Germany) with sample thickness  
1100 set to 70 nm.

1101 Post-staining ultrathin sections were done by incubating the sections with uranyl acetate (in  
1102 methanol) for 1 min, then washed with double deionised water. The sections were then incubated with  
1103 Reynold's lead citrate solution for 1 min and subsequently washed with deionised water, then dried in a  
1104 fume hood. The plant tissue sections were imaged using a Hitachi Transmission Electron Microscope  
1105 HT7700 (Hitachi, Japan) with the acceleration voltage of 80 kV.

1106

## 1107 **Lipidomic profiling**

### 1108 *Lipid extraction*

1109 Surface-sterilized Col-0 seeds were directly germinated and grown vertically on ½ MS agar  
1110 supplemented with DMSO, 25 µM DSF, 2 mM MβCD or DSF+MβCD for 7 days at 22°C, 16 h light/ 8 h  
1111 dark. After one week, 30 seedlings were pooled together as one biological replicate and total lipid was  
1112 extracted as previously described (118). Prior to lipid extraction, 500 pmol each of PC 28:0, PE 28:0, PS  
1113 28:0, PG 28:0, PA 28:0, LPC 20:0, LPE 14:0, LPA 17:0, SM 12:0, Cer 17:0, CerOH 12:0, HexCer 8:0, TG  
1114 48:0 d5, GB3 23:0, and cholesterol d6 were added to each sample as internal standards. The experiment  
1115 involved six biological replicates for each treatment.

1116

### 1117 *LC-MS analysis*

1118 Dried lipid extracts were resuspended in 500 µL Butanol-Methanol (1+1, v/v) and stored at -20 °C  
1119 until LC-MS analysis. Phospholipids, sphingolipids, and sterol lipids were identified using an Agilent 1290  
1120 UHPLC system coupled to an Agilent 6495 triple quadrupole mass spectrometer. Chromatographic  
1121 separation was performed on an Agilent Eclipse Plus C18 reversed phase column (50 x 2.1mm, particle  
1122 size 1.8 µm) using gradient elution of solvent A (water/acetonitrile 60/40, v/v, 10 mM ammonium formate)  
1123 and solvent B (isopropanol/acetonitrile 90/10, v/v, 10 mM ammonium formate). 20% solvent B was

1124 increased to 60 % B over 2 min, and to 100 % B over 5 minutes. The column was flushed with 100 % B  
1125 for 2 minutes, and then reequilibrated with 20 % B for a further 1.8 minutes. The flow rate was 0.4  
1126 mL/min, column temperature was 50 °C, and injection volume was 1 µL. The JetStream ion source was  
1127 operated at the following conditions: Gas temperature, 200 °C; gas flow, 12 L/min; nebulizer gas  
1128 pressure, 25 psi; sheath gas heater temperature, 400 °C; sheath gas flow, 12 arbitrary units; capillary  
1129 voltage, 3500 V for positive ion mode, and 3000 V for negative ion mode; Vcharging, 500 for positive ion  
1130 mode, and 1500 for negative ion mode; positive high pressure RF, 200; negative high pressure RF, 90;  
1131 positive low pressure RF, 100; negative low pressure RF, 60; fragmentor voltage, 380 V; cell accelerator  
1132 voltage, 5 V; dwell time, 1 ms.

1133 The injection order of 24 samples (six replicates of four treatment groups) was randomised, and  
1134 bracketed by injections of pooled quality control and extracted blank samples to monitor system stability  
1135 and carryover. The whole sample set was analysed twice consecutively with different SRM settings. One  
1136 injection was for phospholipids and sterols using SRM transitions from Vu *et al.* (118), and the second  
1137 method detected plant sphingolipids with SRM transitions adapted from Markham *et al.* (119).

#### 1138 *Data processing*

1139 Lipids were analysed based on characteristic SRM transitions and retention time using Agilent  
1140 MassHunter Quantitative Analysis for QQQ (v. B.07.00). Further processing, including normalisation to  
1141 suitable internal standards was performed in Microsoft Excel. High-resolution LC-MS data was processed  
1142 using XCalibur QuanBrowser 3.0.63 (Thermo Fisher).

1143

#### 1144 **Immunoblot analysis**

1145 Three leaves discs (0.7 cm in diameter) from 5 to 6-week old *Arabidopsis* plants were cut into  
1146 strips and floated for 24 h in sterile water in 24-well plates under constant light to reduce stress due to  
1147 wounding. DMSO or DSF were added into the wells 24 h before elicitation with 10 µM flg22. Leaf tissue  
1148 was washed with sterile water to remove the elicitor and flash-frozen in liquid nitrogen at different  
1149 timepoints. Total protein extraction was performed as described previously (85).

1150 To detect the flagellin receptor, we used α-GFP antibody (1:200; Torrey Pines BioLabs, NJ,  
1151 U.S.A) to probe for the FLS2-GFP in FLS2-GFP transgenic plants. For monitoring p-MAPK response, we  
1152 used α-p-MAPK antibody (1:3000; Cell Signalling Technology, MA, U.S.A) to detect phosphorylated  
1153 MAPKs in Col-0 leaf tissue after flg22 peptide elicitation. Western blot membranes were stained with  
1154 Ponceau S as internal loading control.

1155

#### 1156 **Measurement of callose deposition**

1157 Measurement of plant callose deposition in response to bacterial flagellin peptide was performed  
1158 on two-week old Col-0 seedlings germinated on ½ MS medium. Whole seedlings were individually placed  
1159 in 6-well plates with 4 ml of liquid ½ MS supplemented with DMSO or 25 µM DSF for 24 h at 22°C, then

1160 elicited for 24 h with 1  $\mu$ M of flg22. Challenged plants were destained with acetic acid:ethanol (1:3)  
1161 overnight, then washed in 150 mM  $K_2HPO_4$  for 30 min. Destained leaves were incubated in 0.01% aniline  
1162 blue (dissolved in 150 mM  $K_2HPO_4$ ) in the dark for 2 h, then mounted on microscope slides in 50%  
1163 glycerol. Callose deposition were observed on a Zeiss ELYRA PS.1 + LSM780 system using a DAPI filter  
1164 (excitation:emission, 370:509 nm) with a 10X objective. The experiment was repeated twice, each  
1165 involved 8 individual plants and at least 6 images were taken from each plant.

1166

### 1167 **Stomatal closure assay**

1168 Five-week-old Col-0 plants were used to determine the stomatal closure response in response to  
1169 the flg22 peptide. Briefly, two-three leaves/plant were marked with a permanent marker, then infiltrated  
1170 with DMSO or 25  $\mu$ M DSF (diluted in sterilised 10 mM  $MgCl_2$ ). The plants were returned to the growth  
1171 chamber for an additional 24 h. The next day, infiltrated leaves were excised from the plants and the  
1172 abaxial epidermis was peeled off and transferred to a petri disc containing sterile water using a natural-  
1173 hair brush (size 8). 10  $\mu$ M flg22 was added to the samples for 30 min. The epidermal peels were stained  
1174 with 20  $\mu$ M propidium iodine for 5 min and rinsed briefly with sterile water, then mounted on microscope  
1175 slides without coverslips and examined under a wide-field fluorescence microscope (Leica) equipped with  
1176 RFP filter using a 10X objective lense. The experiments involved measurements of  $\geq 130$  stomata from at  
1177 least 10 images taken from five individual plants.

1178

### 1179 **ROS production**

1180 Measurement of ROS burst in *Arabidopsis* apoplast elicited by flg22 was performed as described  
1181 previously (24). Briefly, each leaf disc (0.7 cm in diameter) from 5 to 6-week old *Arabidopsis* plants was  
1182 cut into 5 strips, floated on sterile water for 24 h in white 96-well plates under constant light at room  
1183 temperature to reduce stress from wounding. Drugs were added into the wells prior to elicitation with 1  
1184  $\mu$ M flg22 as followed: 25  $\mu$ M DSF/DMSO control, 24 h; 2 mM  $M\beta$ CD, 30 min; 50  $\mu$ M sterol mix, 24 h; 1  $\mu$ M  
1185 Lovastatin, 24 h. Each ROS experiment was performed in duplicate and experiments showing on the  
1186 same graph were performed in the same plate.

1187

### 1188 **Plant infection assay**

1189 Two-week old *Arabidopsis* plants grown on  $\frac{1}{2}$  MS agar was used for flood-inoculation with  
1190 *Pseudomonas syringae* pv. *tomato* DC3000 (*Pst* DC3000). Using *Pst* DC3000, a bacterial pathogen with  
1191 a different quorum sensing system other than DSF, allowed us to dissect the effect of DSF on plant  
1192 immunity independent of effector proteins activation and other bacterial traits regulated by quorum  
1193 sensing. Briefly, plants were flooded with 40 ml of 10 mM  $MgCl_2$  solution containing 25  $\mu$ M DSF or DMSO  
1194 (control). After 1 day, the liquid was decanted and another 40 ml of  $MgCl_2$  containing either 1  $\mu$ M of flg22  
1195 or water was poured into each plate. On the next day, the seedlings were inoculated with  $5 \times 10^6$  CFU/ml  
1196 of *Pst* DC3000 prepared in 10 mM  $MgCl_2$ . Bacterial population was determined 4 days post-inoculation



1197 (DPI) by dilution plating as described previously (120). The experiment was repeated twice with 9-12  
1198 technical replicates/treatment.

### 1199 **Co-immunoprecipitation**

1200 The constructs for transient expression of BAK1 and FLS2 have been described earlier (93).  
1201 Protoplast-based co-IP assays were conducted as previously described (121). Briefly, 1 ml of transfected  
1202 protoplasts were incubated for 12 h for protein expression in the presence of 1  $\mu$ M DSF (Sigma, USA),  
1203 and were treated with or without 1  $\mu$ M flg22 (MoonBiochem, China) for 10 min before harvest. Briefly,  
1204 cells were lysed in 500  $\mu$ l IP buffer [10 mM HEPES, pH 7.5, 100 mM NaCl, 1 mM EDTA, 10% glycerol,  
1205 1% Triton-X100, and 1 $\times$  protease inhibitor cocktail (Roche, USA)], and 30  $\mu$ l of protein lysate was kept as  
1206 the input fraction. The remaining 470  $\mu$ l lysate was incubated with 10  $\mu$ l anti-FLAG M2 affinity gel (Sigma,  
1207 USA) at 4°C for 3 h. After being washed five times with ice-cold IP buffer and once with 50 mM Tris-HCl  
1208 (pH 7.5), the bound proteins were solubilized by boiling the beads in 60  $\mu$ l 2 $\times$ SDS-PAGE loading buffer,  
1209 and were detected by immunoblotting using anti-FLAG (Sigma, USA) or anti-HA antibody (Roche, USA).  
1210 The experiment was repeated twice.

1211

### 1212 **QUANTIFICATION AND STATISTICAL ANALYSIS**

1213 Statistical analyses and data visualisation were performed using GraphPad Prism 7.0 (GraphPad,  
1214 CA, U.S.A.). Mean comparisons were performed using one-way ANOVA (\* p < 0.05; \*\* p < 0.01; \*\*\* p <  
1215 0.001; \*\*\*\* p < 0.0001; ns = not significant). Unless specified, data were presented as box-and-whiskers  
1216 plots with bars indicated the median, 25% and 75% quartiles.

A

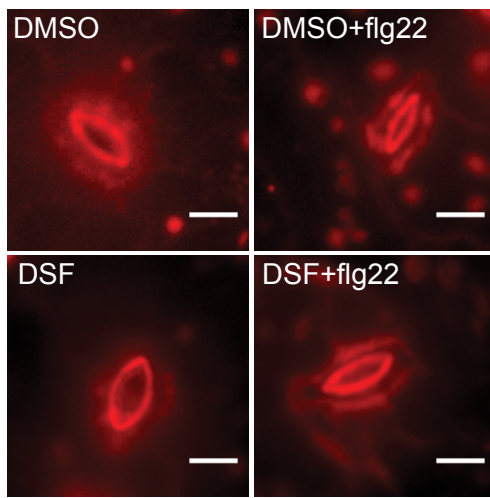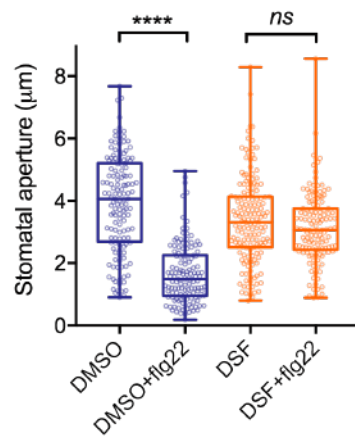

C

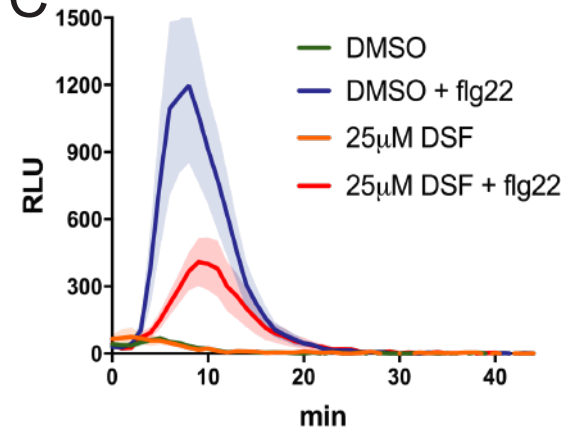

B

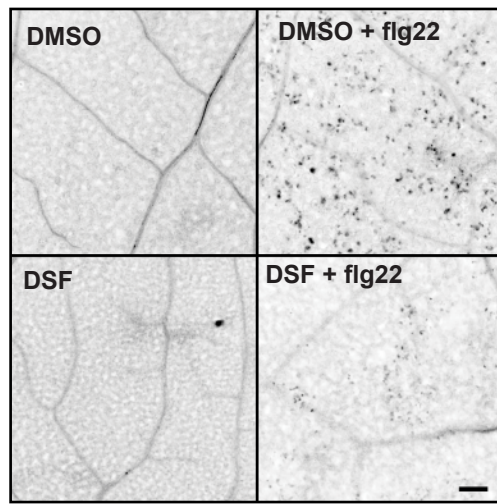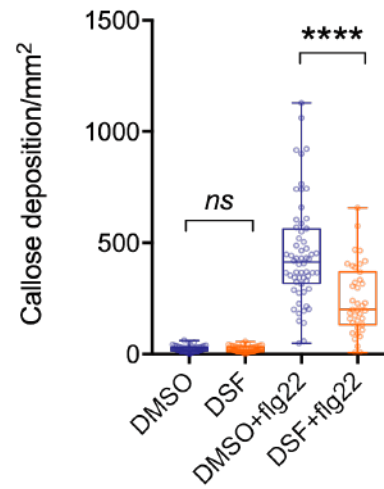

D

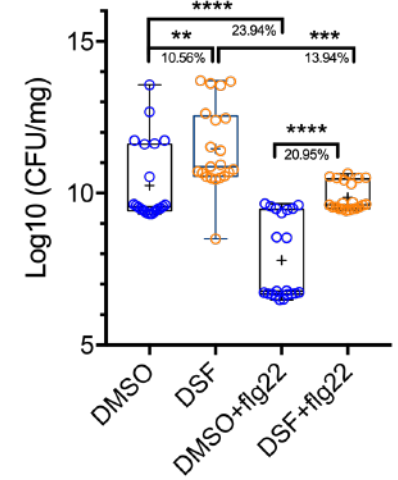

E

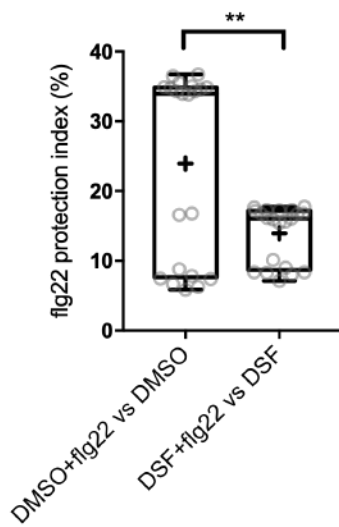

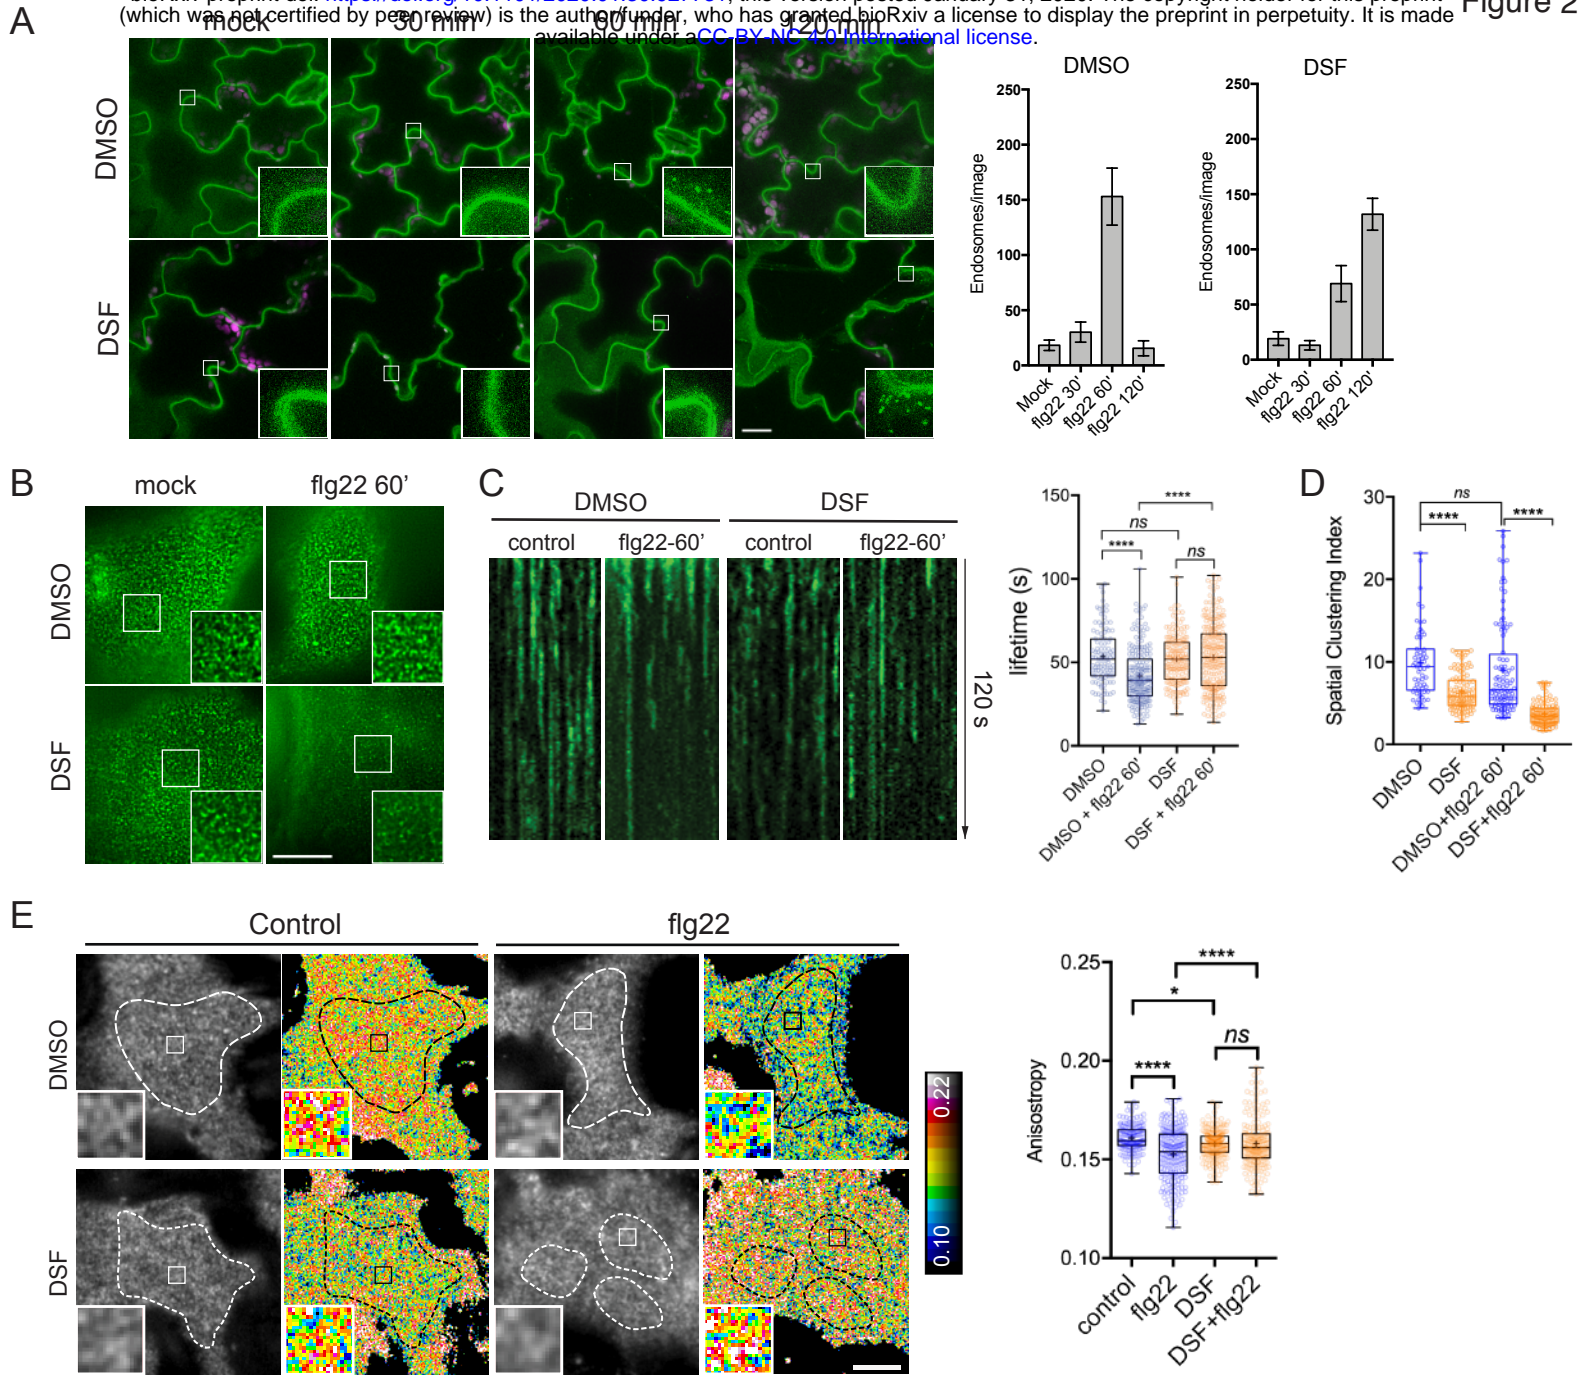

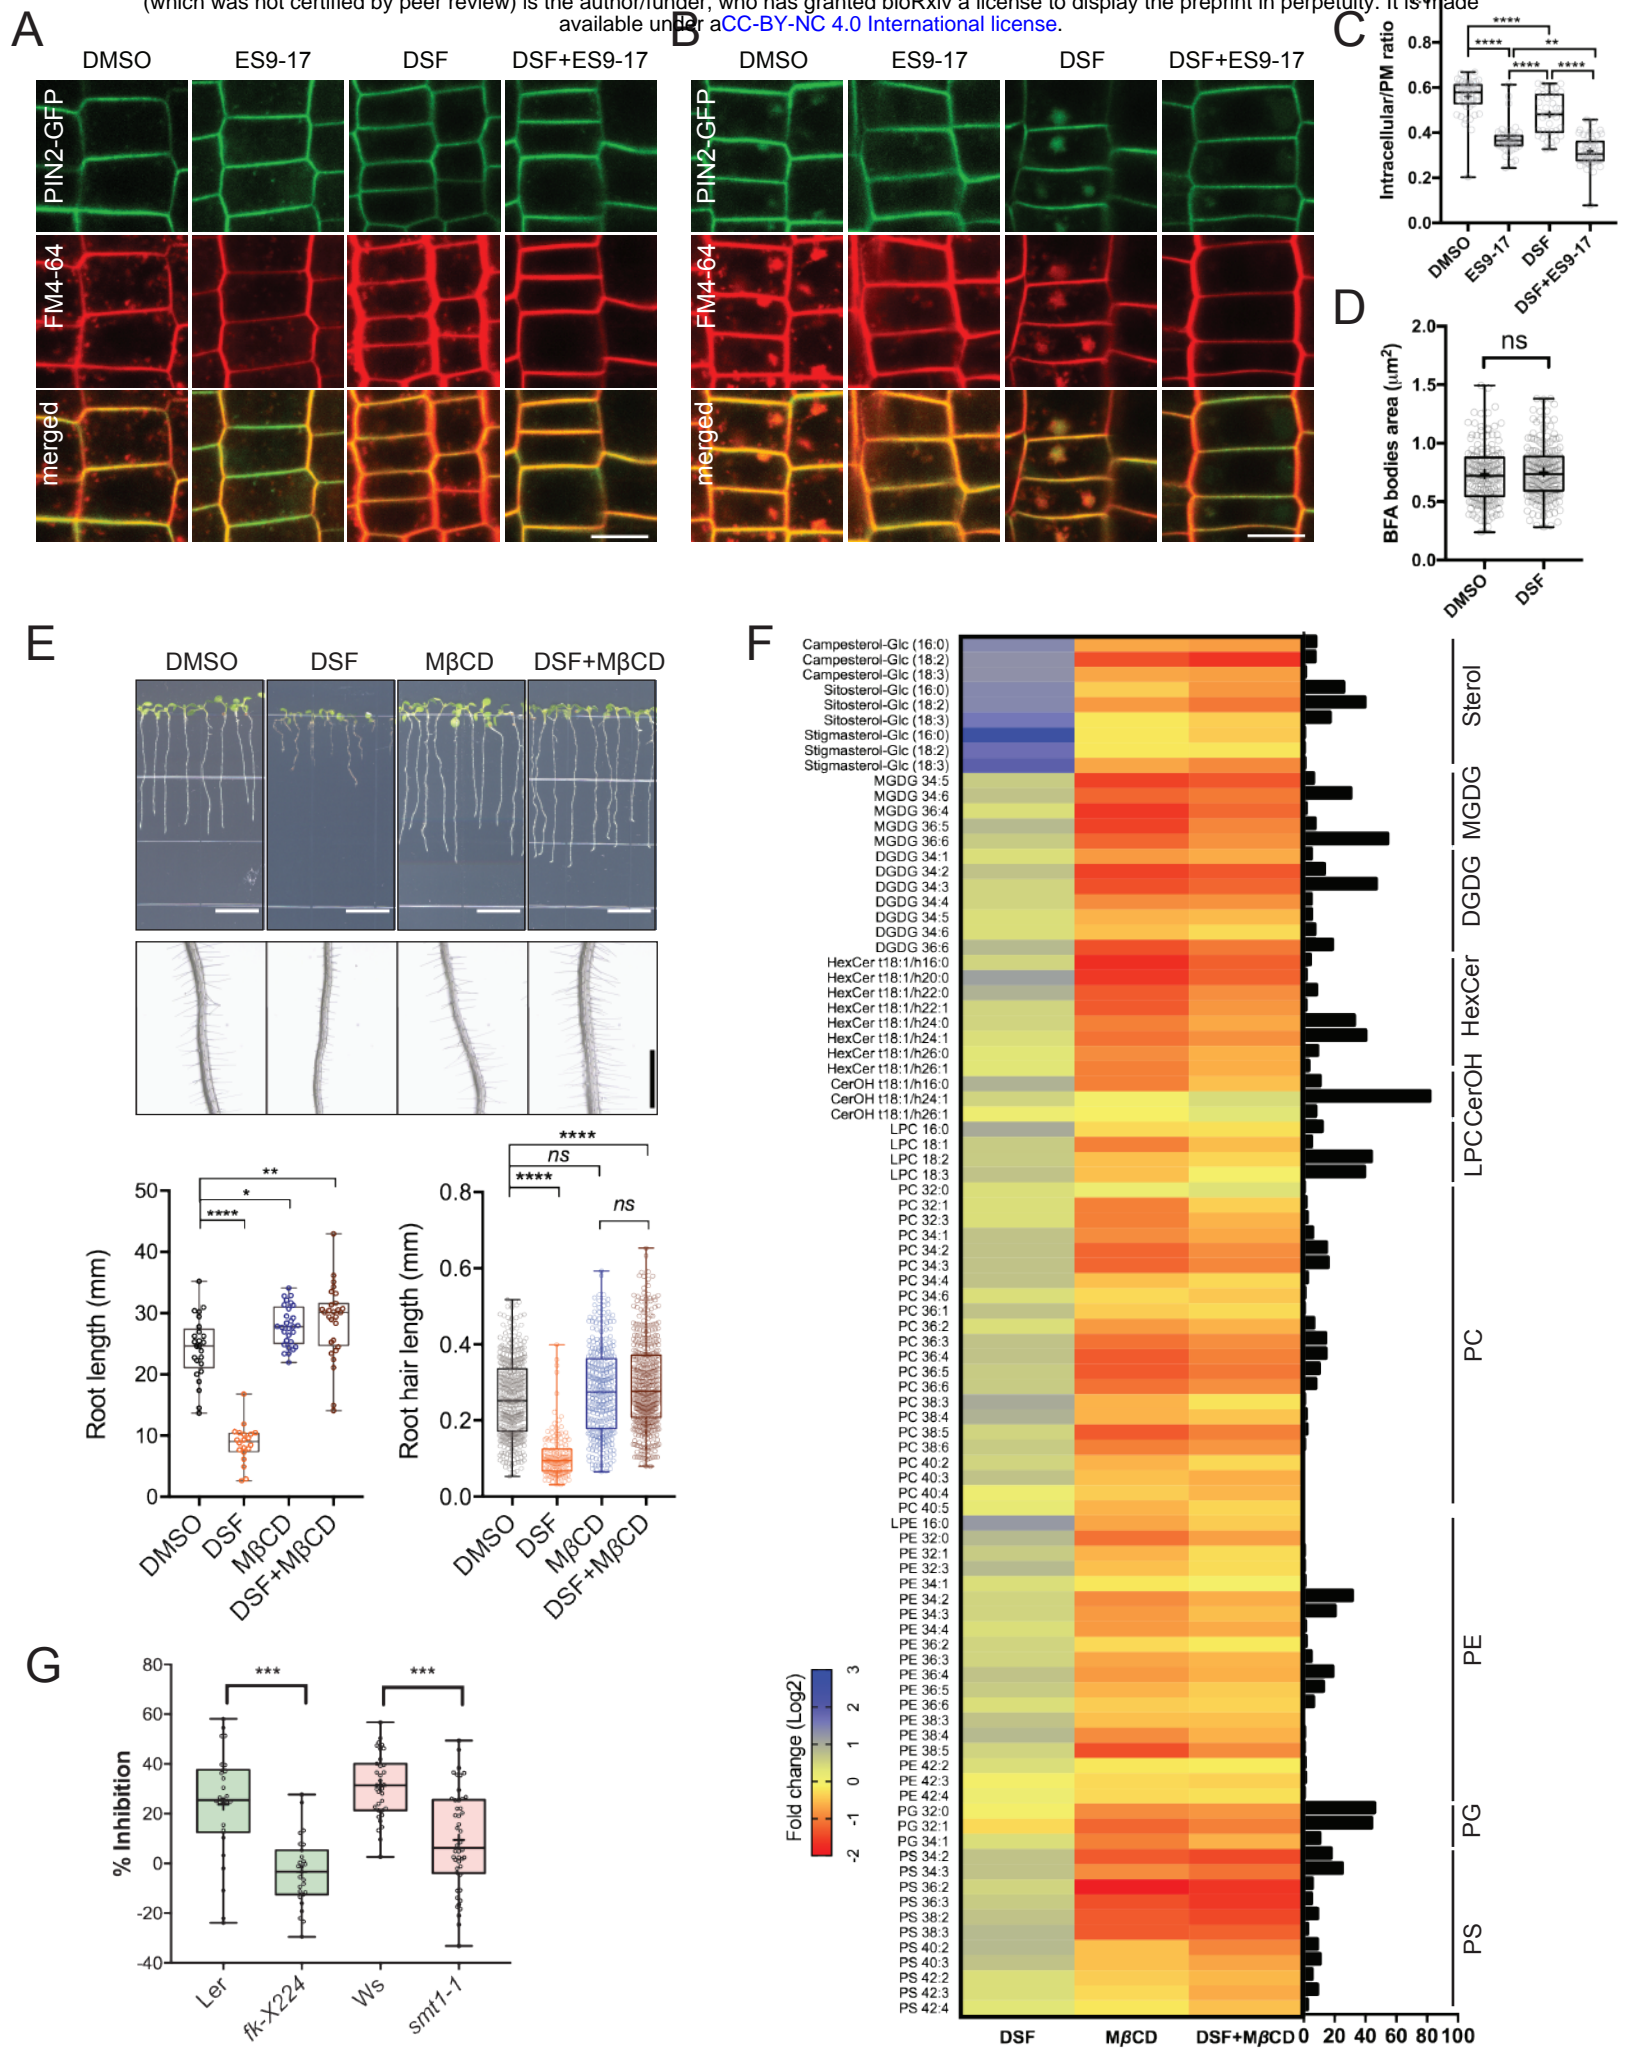

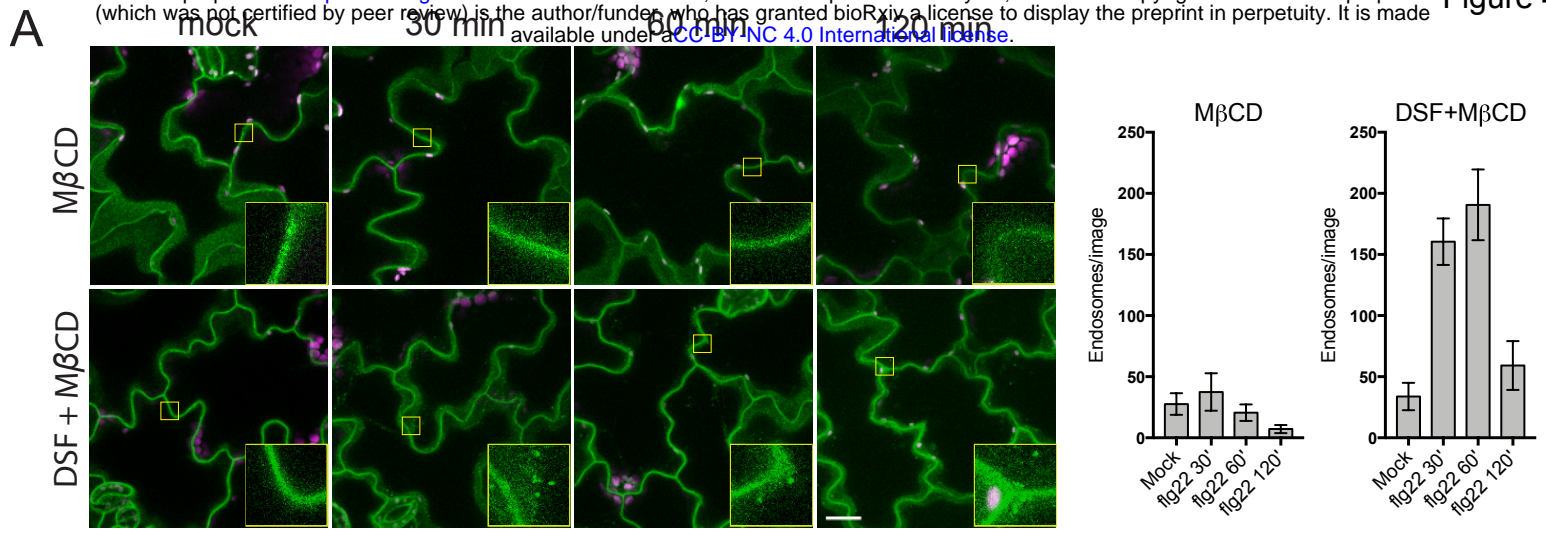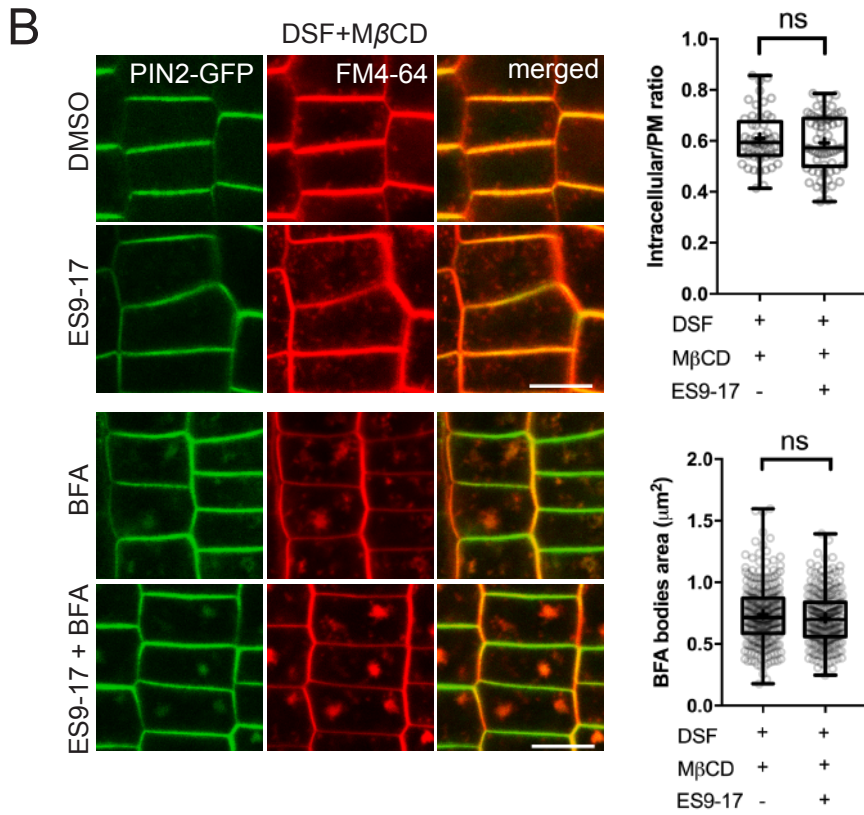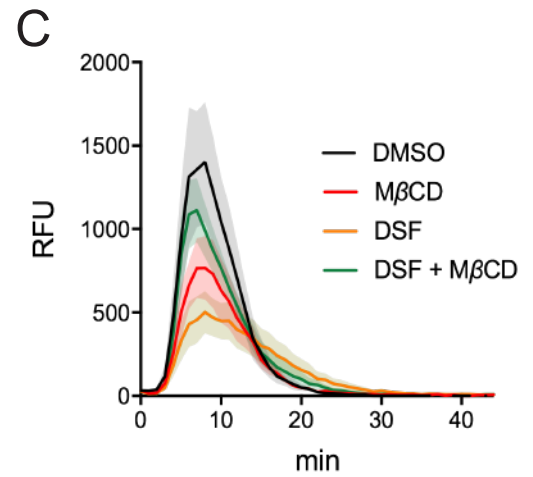

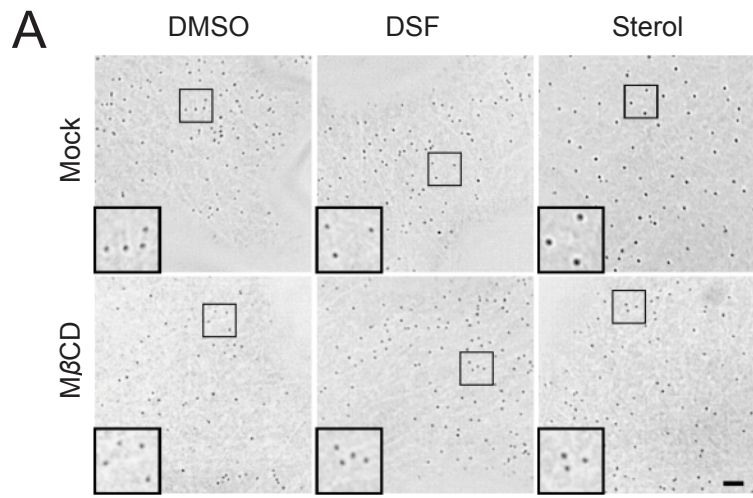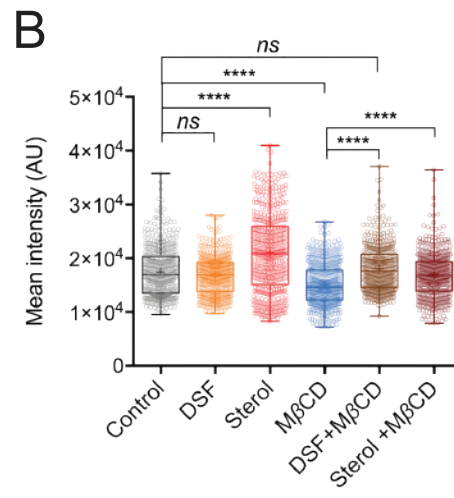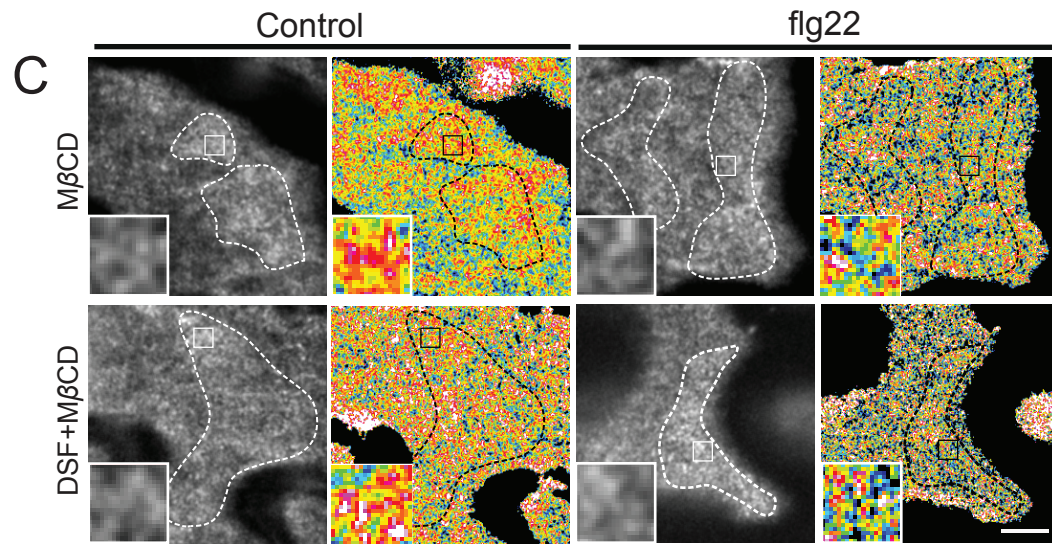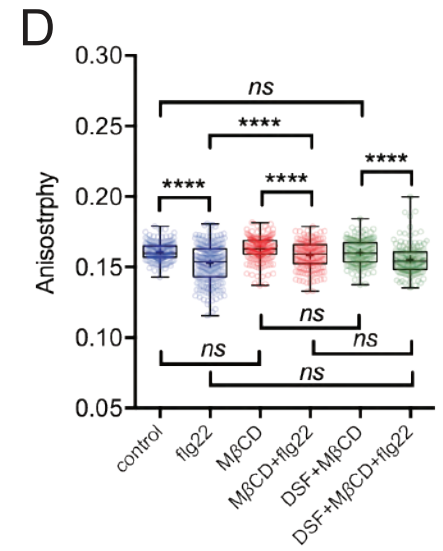

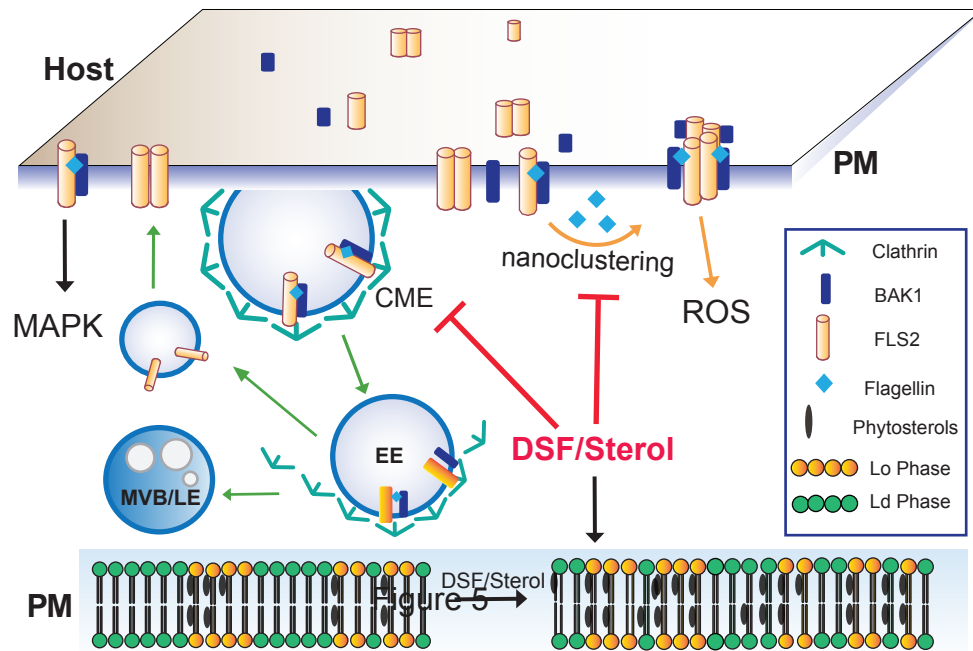

Source: https://www.biorxiv.org/content/10.1101/2020.01.30.927731v1.full.pdf
